# Supplementary material for: S-nitrosylation of the Peroxiredoxin-2 promotes S-nitrosoglutathione-mediated lung cancer cells apoptosis via AMPK-SIRT1 pathway
Source: PubMed Central journal article supplement (PMC6465399; doi:10.1038/s41419-019-1561-x), 2019-04-15

## Supplementary materials for

**S-nitrosylation of the Peroxiredoxin-2 promotes S-nitrosoglutathione-mediated lung cancer cells apoptosis via AMPK-SIRT1 pathway**

Yihan Zhang<sup>1, 2, 3</sup>, Changning Sun<sup>1, 2, 3</sup>, Guokai Xiao<sup>1, 2, 3</sup>, Hui Shan<sup>1, 2, 3</sup>, Luyao Tang<sup>1, 2, 3</sup>, Yujiao Yi<sup>1, 2, 3</sup>, Wengong Yu<sup>1, 2, 3,\*</sup>, Yuchao Gu<sup>1, 2, 3,\*</sup>

<sup>1</sup> Key Laboratory of Marine Drugs, Ministry of Education; School of Medicine and Pharmacy, Ocean University of China, 5 Yushan Road, Qingdao, 266003 China.

<sup>2</sup> Laboratory for Marine Drugs and Bioproducts of Qingdao National Laboratory for Marine Science and Technology, Qingdao, 266200 China.

<sup>3</sup> Key Laboratory of Glycoscience & Glycotechnology of Shandong Province, Qingdao, 266003 China.

**Supplementary Figure 1. GSNO induces lung cancer cell NCI-H1299 apoptosis.**

(a) NCI-H1299 cells were treated with different concentrations of GSNO (0-0.5 mM) (Bar = 20  $\mu$ m). (b) Cell viability analysis of NCI-H1299 cells after GSNO treatment. (c) Flow cytometry analysis of live cells after treating with GSNO. (d) Expression of Cleavage of Caspase-3 in NCI-H1299 cells was probed by western blot. (e) Colony formation of NCI-H1299 cells treated with GSNO. (f) The synergistic effects of GSNO (0.3 mM) with cisplatin (10  $\mu$ M) or paclitaxel (20  $\mu$ M) on NCI-H1299 cells. The data are expressed as the mean  $\pm$  SD of three independent experiments. \* $P$  < 0.05, \*\* $P$  < 0.01, \*\*\* $P$  < 0.001, using one-way ANOVA followed by Bonferroni's multiple comparisons test.

**Supplementary Figure 2. SNAP or LPS induces A549 cell apoptosis.**

(a) Cell viability analysis of lung cancer cells (A549 and NCI-H1299) and normal cells (WI38 and BEAS-2B) treated with GSNO for 24 h (\*\*\* $P$  < 0.001, using two-way ANOVA followed by Bonferroni's multiple comparisons test). (b) Cell viability analysis of A549 treated with GSNO (0.3 mM) or/and SNAP (200  $\mu$ M) for 24 h (\* $P$  < 0.05, using one-way ANOVA followed by Bonferroni's multiple comparisons test). (c) Induction of Cleavage of Caspase-3 in A549 cells treated with GSNO or/and SNAP for 24 h (\* $P$  < 0.05, \*\*\* $P$  < 0.001, using one-way ANOVA followed by Bonferroni's multiple comparisons test). (d) The NO production in A549 cells after SNAP or GSNO treatment (\* $P$  < 0.05, \*\* $P$  < 0.01, \*\*\* $P$  < 0.001, using one-way ANOVA followed by Bonferroni's multiple

comparisons test). (e) Cell viability analysis of A549 treated with SNAP compared with GSNO ( $***P < 0.001$ , using two-way ANOVA followed by Bonferroni's multiple comparisons test). (f) The NO production in A549 cells after LPS treatment ( $**P < 0.01$ ,  $***P < 0.001$ , using one-way ANOVA followed by Bonferroni's multiple comparisons test). (g) Cell viability analysis of A549 treated with LPS for 24 h ( $*P < 0.05$ ,  $**P < 0.01$ ,  $***P < 0.001$ , using one-way ANOVA followed by Bonferroni's multiple comparisons test). (h) Induction of Cleavage of Caspase-3 in A549 cells treated with GSNO or/and LPS (150  $\mu\text{g/ml}$ ) for 24 h ( $*P < 0.05$ , using one-way ANOVA followed by Bonferroni's multiple comparisons test). The data are expressed as the mean  $\pm$  SD of three independent experiments.

### **Supplementary Figure 3. GSNO nitrosylates Prdx2 in NCI-H1299 cells.**

(a) Effect of GSNO on cell number with or without ODQ (25  $\mu\text{M}$ ) for 24 h in A549 cells (ns, not significant, using two-way ANOVA followed by Bonferroni's multiple comparisons test). (b) Effect of GSNO on cell number with or without DTT (0.5 mM) for 24 h in A549 cells ( $***P < 0.001$ , using two-way ANOVA followed by Bonferroni's multiple comparisons test). (c) Effect of GSNO on cell viability with or without DTT (0.5 mM) for 24 h in NCI-H1299 cells ( $**P < 0.01$ , using two-way ANOVA followed by Bonferroni's multiple comparisons test). (d-h) mRNA expression level of Prdx1, Prdx3, Prdx4, Prdx5, Prdx6 in different kinds of human lung cancer tissues and normal tissues ( $*P < 0.05$ ,  $***P < 0.001$ , using one-way ANOVA followed by Bonferroni's multiple comparisons

test). (i, j) mRNA expression level of Prdx2 and Prdx4 in human lung cancer cells (A549 and NCI-H1299) and normal lung cells (WI38 and BEAS-2B,  $*P < 0.05$ ,  $**P < 0.01$ ,  $***P < 0.001$ , ns, not significant, using one-way ANOVA followed by Bonferroni's multiple comparisons test). (k) Prdx2 protein expression in human lung cancer cells (A549 and NCI-H1299) and normal lung cells (WI38 and BEAS-2B) ( $*P < 0.05$ ,  $**P < 0.01$ ,  $***P < 0.001$ , using one-way ANOVA followed by Bonferroni's multiple comparisons test). (l) Detection of Prdx2 nitrosylation by biotin-switch assay in NCI-H1299 cells ( $*P < 0.05$ ,  $**P < 0.01$ , ns, not significant, using one-way ANOVA followed by Bonferroni's multiple comparisons test). (m) Detection for the nitrosylation of total protein and Prdx2 by saville-Griess assay ( $*P < 0.05$ ,  $**P < 0.01$ , using unpaired two-tailed Student's *t*-test). (n) The cell viability of A549 cells transfected with pCMV-Prdx2 was detected by MTT assay ( $**P < 0.01$ , using two-way ANOVA followed by Bonferroni's multiple comparisons test). The data are expressed as the mean  $\pm$  SD of three independent experiments.

**Supplementary Figure 4. GSNO induces apoptosis in lung cancer cells via H<sub>2</sub>O<sub>2</sub> accumulation.**

(a) Detection of intracellular H<sub>2</sub>O<sub>2</sub> after GSNO treatment for 24 h in NCI-H1299 cells ( $*P < 0.05$ ,  $***P < 0.001$ , using one-way ANOVA followed by Bonferroni's multiple comparisons test). (b) The effect of H<sub>2</sub>O<sub>2</sub> (50  $\mu$ M) on A549 cells (Bar = 20  $\mu$ m). (c) Flow cytometry analysis of live A549 cells after treating A549 cells with H<sub>2</sub>O<sub>2</sub> (50  $\mu$ M). (d) Cell number analysis of A549 cells cultured in the



presence of H<sub>2</sub>O<sub>2</sub> for 24 h (\*\**P* < 0.01, using unpaired two-tailed Student's *t*-test). (e) The effect of H<sub>2</sub>O<sub>2</sub> (50 μM) on NCI-H1299 cells (Bar = 20 μm). (f) Flow cytometry analysis of live NCI-H1299 cells after treating with H<sub>2</sub>O<sub>2</sub> (50 μM). (g, h) Cell viability and number analysis of NCI-H1299 cells cultured in the presence of H<sub>2</sub>O<sub>2</sub> (50 μM) for 24 h (\*\**P* < 0.01, using unpaired two-tailed Student's *t*-test). The data are expressed as the mean ± SD of three independent experiments.

**Supplementary Figure 5. GSNO induces cell death via activating the phosphorylation of AMPK.**

(a) Expression of AMPK phosphorylation after GSNO treatment in NCI-H1299 cells (\**P* < 0.05, \*\**P* < 0.01, \*\*\**P* < 0.001, using one-way ANOVA followed by Bonferroni's multiple comparisons test). (b) Expression of p-ACC and p-AMPK/AMPK in A549 cells treated with GSNO (0.3 mM) or/and SNAP (200 μM) (\**P* < 0.05, \*\**P* < 0.01, using one-way ANOVA followed by Bonferroni's multiple comparisons test). (c) Expression of p-ACC and p-AMPK/AMPK in A549 cells treated with GSNO or/and LPS (150 μg/ml) (\**P* < 0.05, \*\**P* < 0.01, using one-way ANOVA followed by Bonferroni's multiple comparisons test). (d) Expression of AMPK phosphorylation after H<sub>2</sub>O<sub>2</sub> (50 μM) treatment in NCI-H1299 cells (\*\**P* < 0.01, using unpaired two-tailed Student's *t*-test). (e, f) The effect of AICAR (1 mM) or Compound C (20 μM) on AMPK phosphorylation in GSNO-treated A549 cells (\*\*\**P* < 0.001, using one-way ANOVA followed by Bonferroni's multiple comparisons test). (g) The effect of

GSNO on cell viability with AICAR or Compound C in NCI-H1299 cells ( $*P < 0.05$ ,  $**P < 0.01$ , using two-way ANOVA followed by Bonferroni's multiple comparisons test). (h, i) The effect of GSNO on p-ACC and p-AMPK/AMPK expression in AMPK-WT and AMPK-T172A mutant groups ( $**P < 0.01$ , using two-way ANOVA followed by Bonferroni's multiple comparisons test). (j) The effect of GSNO on Cleaved-Caspase 3 expression in AMPK-WT and AMPK-T172A mutant groups ( $**P < 0.01$ , using two-way ANOVA followed by Bonferroni's multiple comparisons test). The data are expressed as the mean  $\pm$  SD of three independent experiments.

**Supplementary Figure 6. The activation of AMPK phosphorylates SIRT1 to inhibit its activity.**

(a) SIRT1 was immunoprecipitated and analyzed for threonine phosphorylation with AICAR (1 mM) or Compound C (20  $\mu$ M) in NCI-H1299 ( $*P < 0.05$ ,  $**P < 0.01$ , using one-way ANOVA followed by Bonferroni's multiple comparisons test). (b) The threonine phosphorylation of SIRT1 in AMPK-WT and AMPK-T172A mutant groups ( $***P < 0.001$ , ns, not significant, using unpaired two-tailed Student's *t*-test). (c) The effect of GSNO on the activity of SIRT1 in NCI-H1299 cells ( $*P < 0.05$ ,  $**P < 0.01$ , using one-way ANOVA followed by Bonferroni's multiple comparisons test). (d) Detection for the activity of SIRT1 after resveratrol (50  $\mu$ M) or suramin (50  $\mu$ M) treatment ( $**P < 0.01$ , using one-way ANOVA followed by Bonferroni's multiple comparisons test). (e, f) The effect of SIRT1 overexpression on cell viability in A549 cells (e) and

NCI-H1299 cells (f) after GSNO treatment (\*\* $P < 0.01$ , \*\*\* $P < 0.001$ , using two-way ANOVA followed by Bonferroni's multiple comparisons test). (g, h) Threonine phosphorylation of SIRT1 after H<sub>2</sub>O<sub>2</sub> treatment in A549 cells (\* $P < 0.05$ , using unpaired two-tailed Student's  $t$ -test). (i) Co-immunoprecipitation of AMPK with SIRT1 after H<sub>2</sub>O<sub>2</sub> (50  $\mu$ M) treatment in A549 cells (\*\* $P < 0.01$ , using unpaired two-tailed Student's  $t$ -test). (j) The activity of SIRT1 after H<sub>2</sub>O<sub>2</sub> treatment in A549 cells (\*\* $P < 0.01$ , using unpaired two-tailed Student's  $t$ -test). (k) Detection of SIRT1 nitrosylation by biotin-switch assay. The data are expressed as the mean  $\pm$  SD of three independent experiments.

**Supplementary Figure 7. GSNO induces A549 cells apoptosis via p53-dependent p21 induction.**

(a) Expression of p53 acetylation and p21 after GSNO (0.3 mM) or/and LPS (150  $\mu$ g/ml) treatment (\* $P < 0.05$ , \*\* $P < 0.01$ , using one-way ANOVA followed by Bonferroni's multiple comparisons test). (b, c) DTT attenuated the increased expression of p53 acetylation and p21 induced by GSNO in A549 cells (\*\* $P < 0.01$ , using two-way ANOVA followed by Bonferroni's multiple comparisons test). The data are expressed as the mean  $\pm$  SD of three independent experiments.

**Supplementary Figure 8. GSNO induces NCI-H1299 apoptosis via FOXO1 activation.**

(a, b) The interaction between SIRT1 and PTEN after treating NCI-H1299 cells

with GSNO ( $*P < 0.05$ ,  $**P < 0.01$ , using unpaired two-tailed Student's  $t$ -test). (c) Detection of PTEN acetylation by immunoprecipitation after treating NCI-H1299 cells with GSNO ( $**P < 0.01$ , using unpaired two-tailed Student's  $t$ -test). (d) Expression of AKT phosphorylation after GSNO treatment ( $*P < 0.05$ ,  $**P < 0.01$ ,  $***P < 0.001$ , using one-way ANOVA followed by Bonferroni's multiple comparisons test). (e) Detection of PTEN acetylation by immunoprecipitation in GSNO treatment or SIRT1 knockdown groups ( $*P < 0.05$ ,  $**P < 0.01$ , using unpaired two-tailed Student's  $t$ -test). (f) Detection of PTEN nitrosylation by biotin-switch assay in indicated groups. The data are expressed as the mean  $\pm$  SD of three independent experiments.

**Supplementary Figure 9. GSNO induces A549 cells apoptosis independent of FOXO1 activation.**

(a) The interaction between SIRT1 and FOXO1 after treating A549 with GSNO (ns, not significant, using unpaired two-tailed Student's  $t$ -test). (b) Detection of FOXO1 acetylation by immunoprecipitation after treating A549 with GSNO (ns, not significant, using unpaired two-tailed Student's  $t$ -test). (c) The interaction of SIRT1 with PTEN after treating A549 with GSNO (ns, not significant, using unpaired two-tailed Student's  $t$ -test). (d) Detection of PTEN acetylation by immunoprecipitation after treating A549 with GSNO (ns, not significant, using unpaired two-tailed Student's  $t$ -test). (e) The effect of GSNO on cell viability when VO-Ohpic trihydrate (50 nM), AS1842856 (0.5  $\mu$ M) or MK2206 (10  $\mu$ M) was added to NCI-H1299 cells ( $***P < 0.001$ , using two-way ANOVA followed

by Bonferroni's multiple comparisons test). (f) Induction of Cleavage of Caspase-3 in NCI-H1299 cells treated with GSNO or/and AS1842856 (0.5  $\mu$ M) ( $*P < 0.05$ , using one-way ANOVA followed by Bonferroni's multiple comparisons test). (g) The effect of GSNO (0.5 mM) on cell viability when Pifithrin- $\beta$  (10  $\mu$ M) or AS1842856 (0.5  $\mu$ M) was added to A549 cells ( $**P < 0.01$ , ns, not significant, using two-way ANOVA followed by Bonferroni's multiple comparisons test). (h) Induction of Cleavage of Caspase-3 in A549 cells treated with GSNO (0.5 mM) or/and Pifithrin- $\beta$  (10  $\mu$ M) ( $**P < 0.01$ , using one-way ANOVA followed by Bonferroni's multiple comparisons test). The data are expressed as the mean  $\pm$  SD of three independent experiments.

**Supplementary Figure 10. The efficiency of overexpression for Prdx2 or SIRT1 and knockdown for SIRT1 or AMPK $\alpha$ 2.**

(a) Representative fluorescence images for transfection in lung cancer cells (Bar = 20  $\mu$ m). (b-d) SIRT1 and Prdx2 expression levels were detected using western blot after cells were transfected with pCDH-SIRT1 or pCMV-Prdx2 plasmids ( $***P < 0.001$ , using unpaired two-tailed Student's  $t$ -test). (e) SIRT1 and AMPK $\alpha$ 2 expression levels were detected after cells were transfected with sh-RNA ( $***P < 0.001$ , using unpaired two-tailed Student's  $t$ -test). The data are expressed as the mean  $\pm$  SD of three independent experiments.

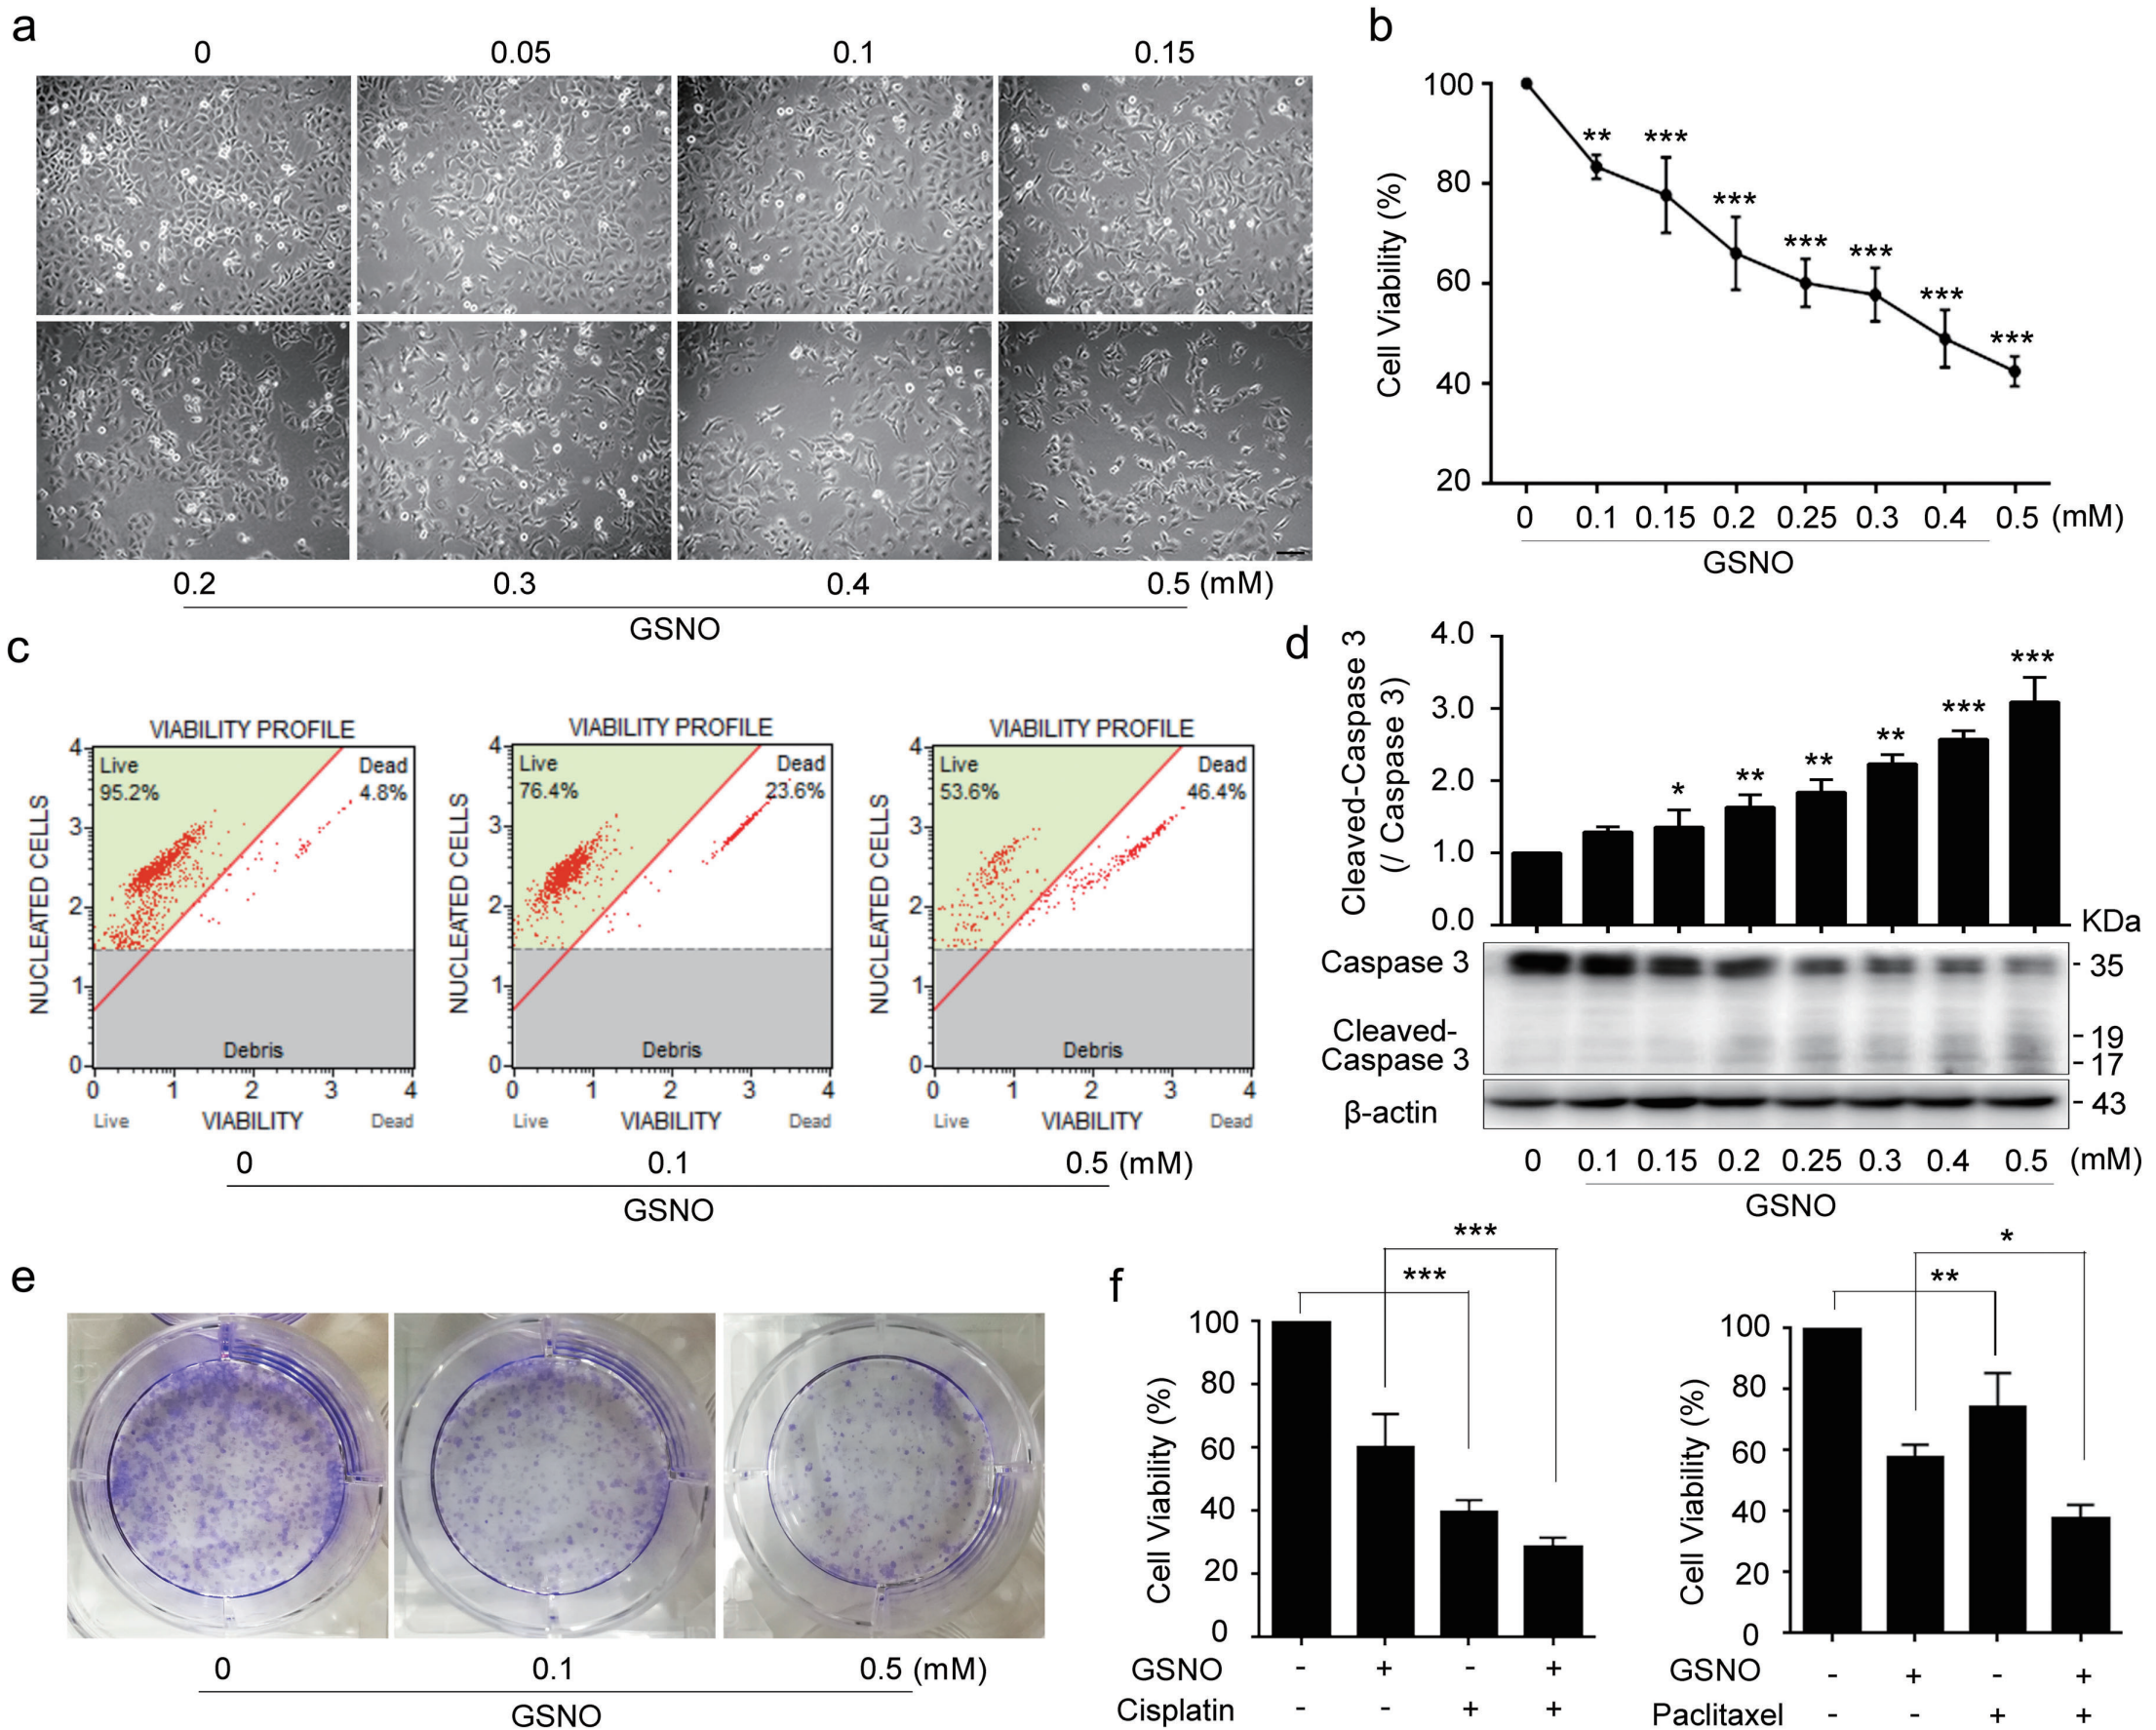

Supplementary Figure 1



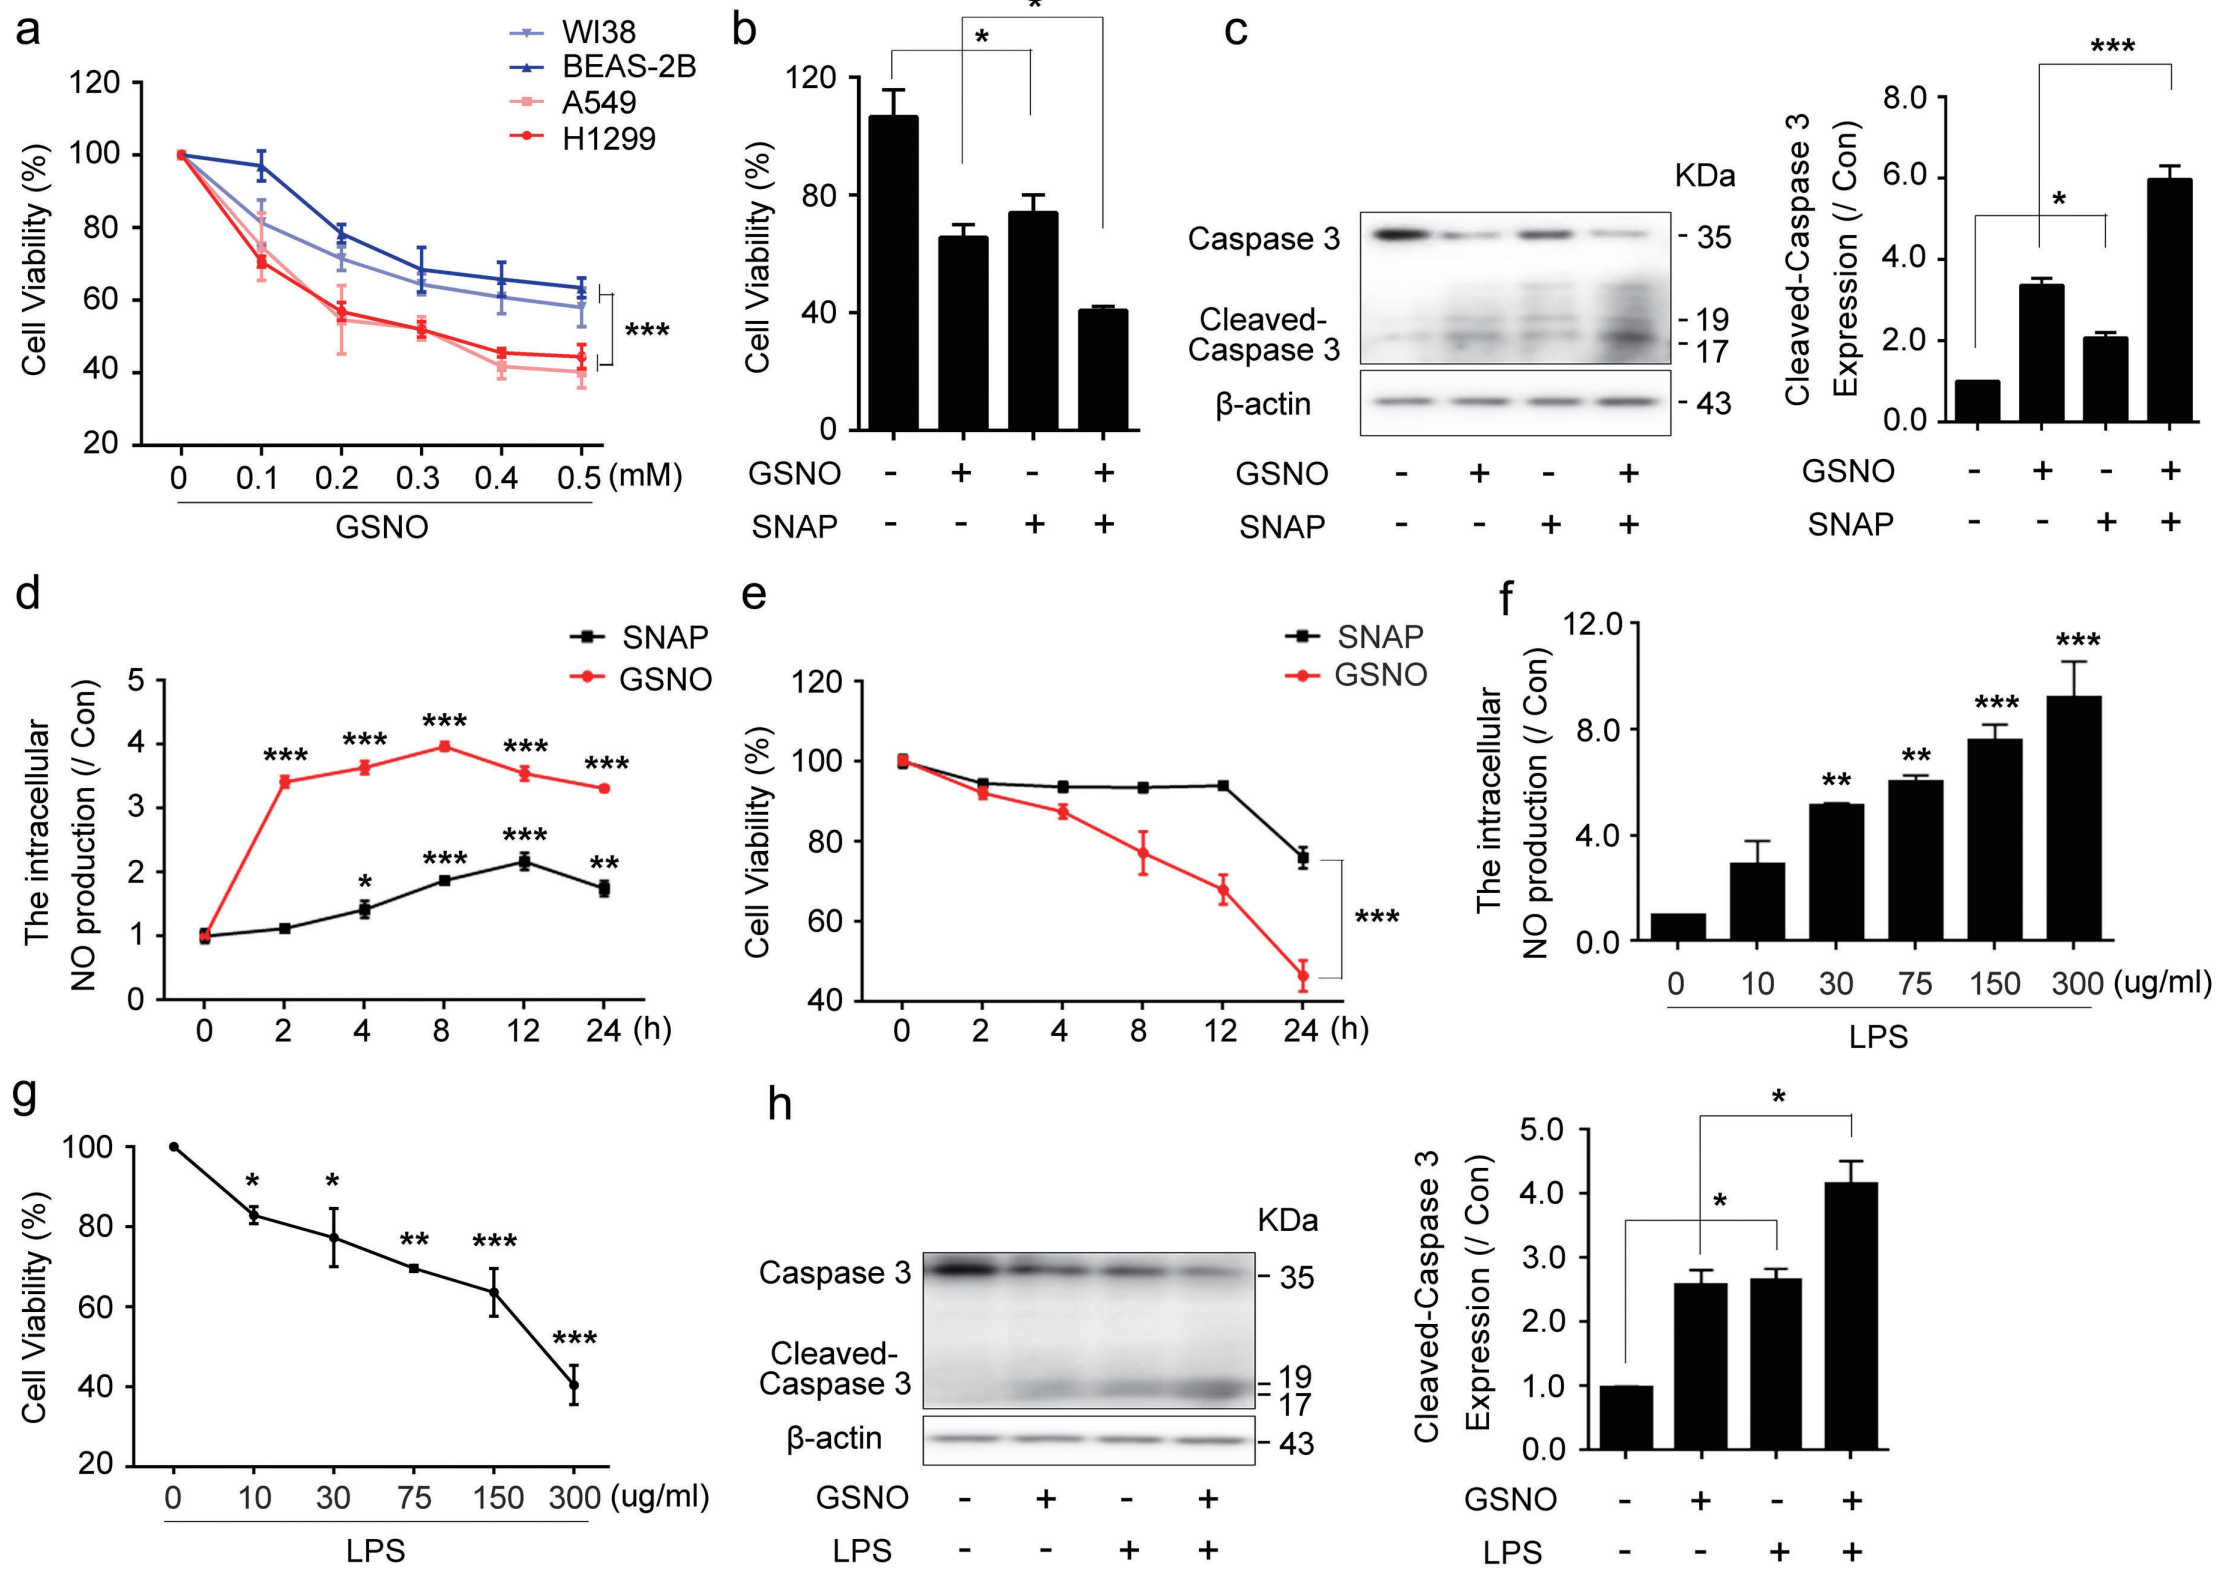

Supplementary Figure 2

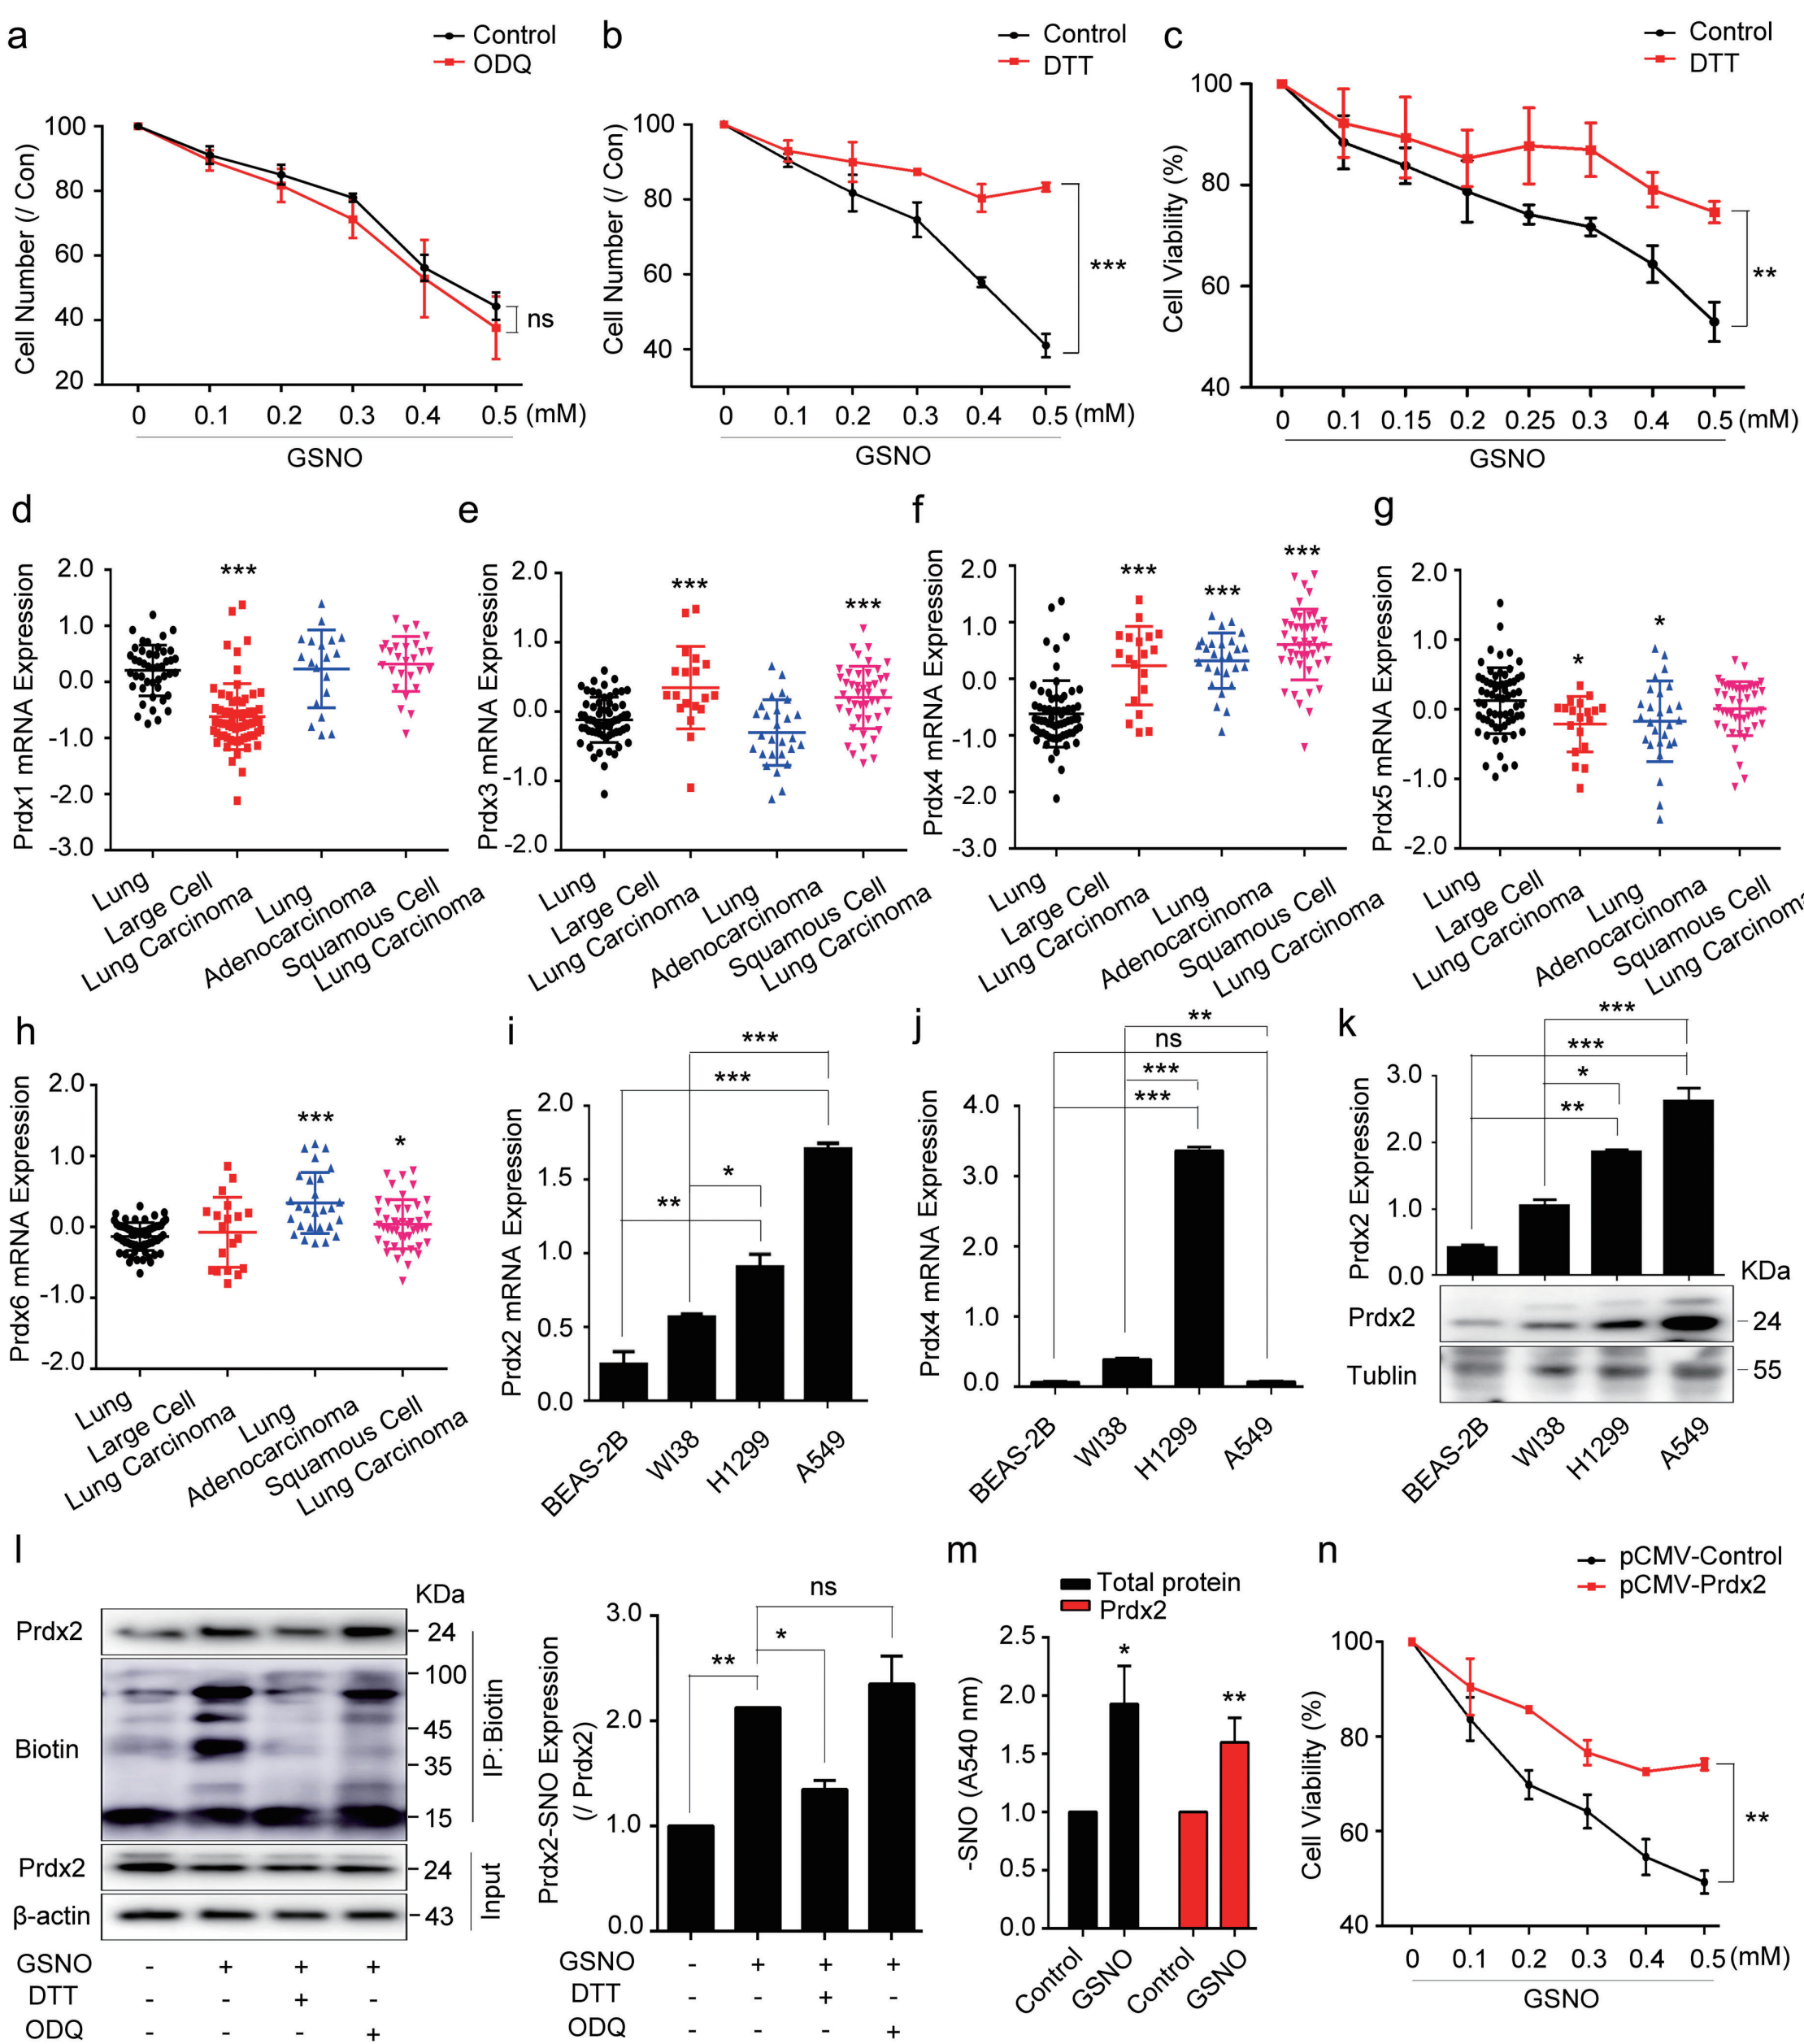

Supplementary Figure 3



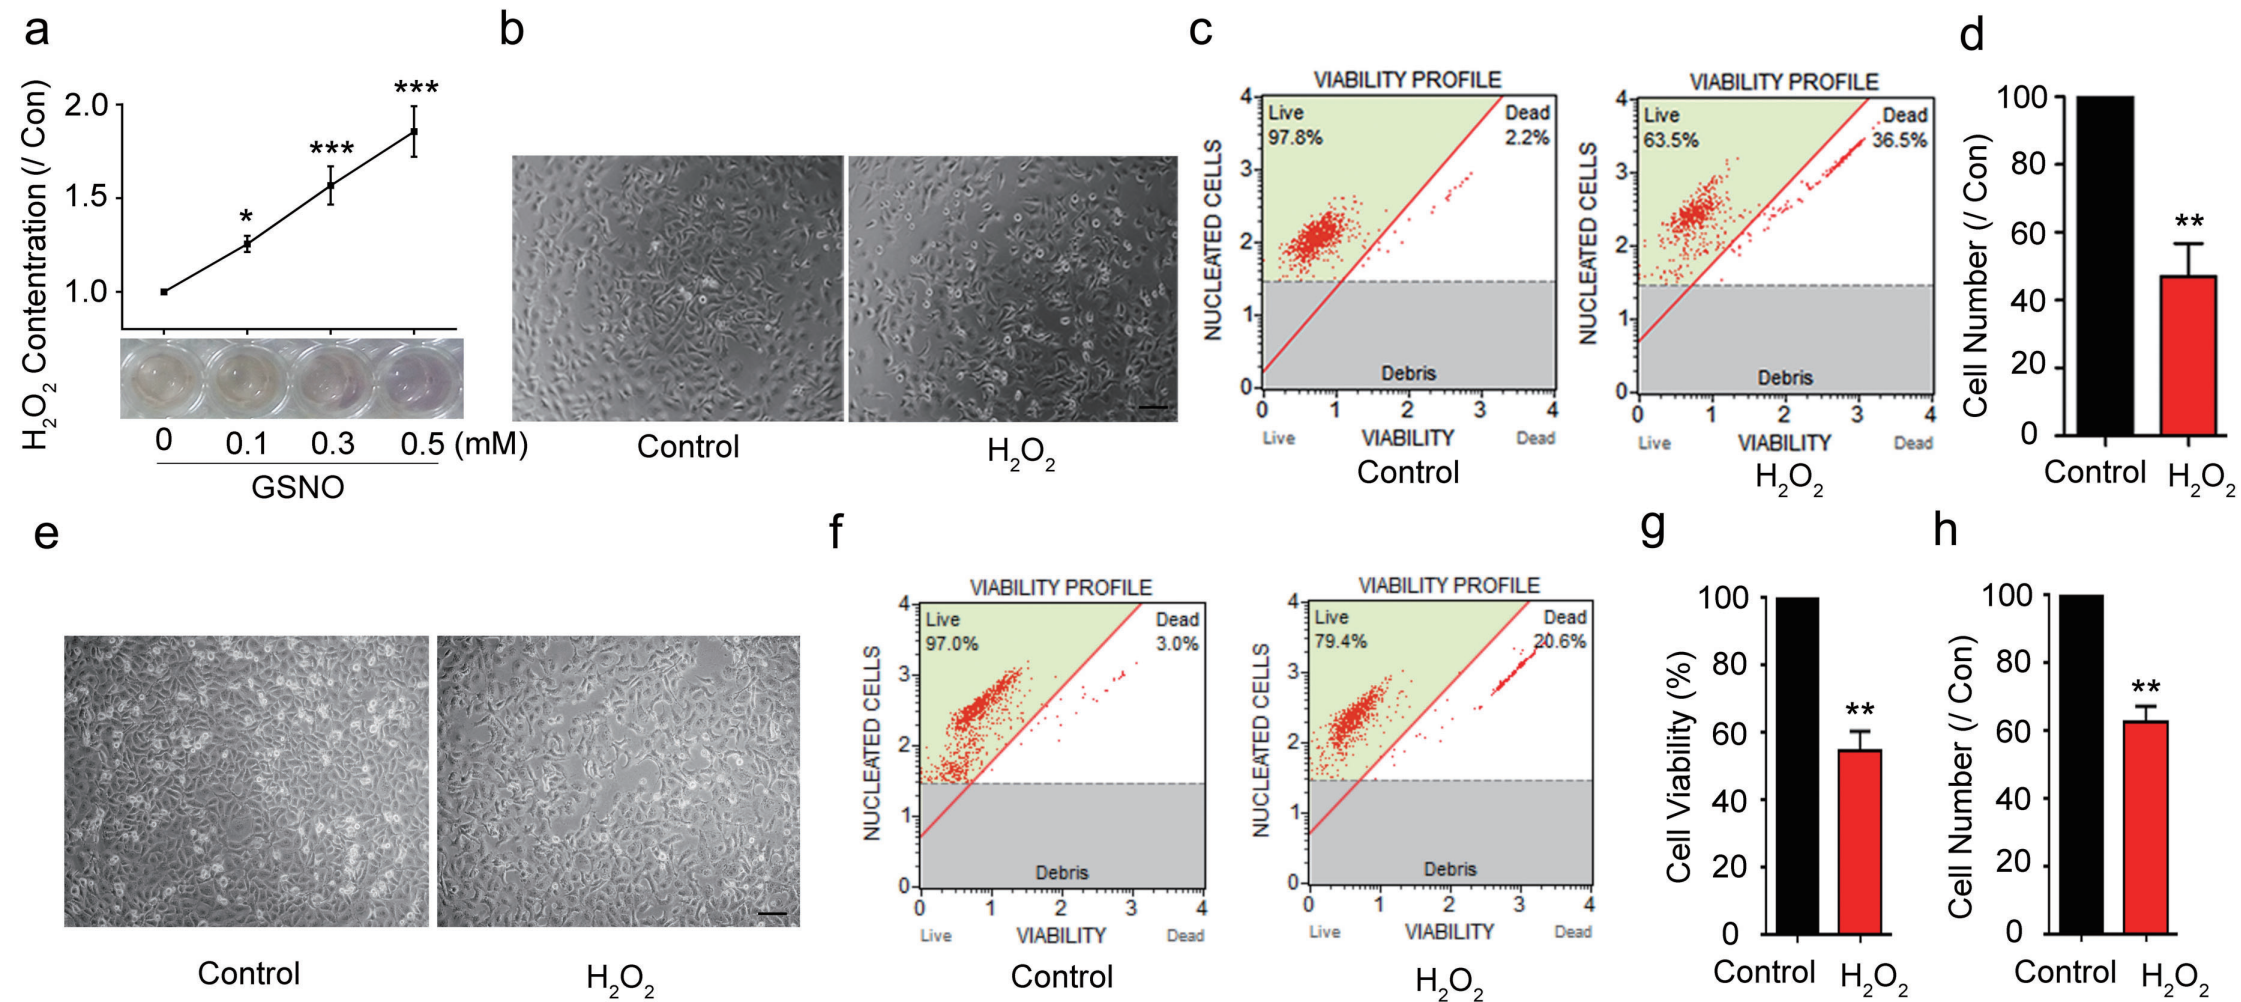

Supplementary Figure 4

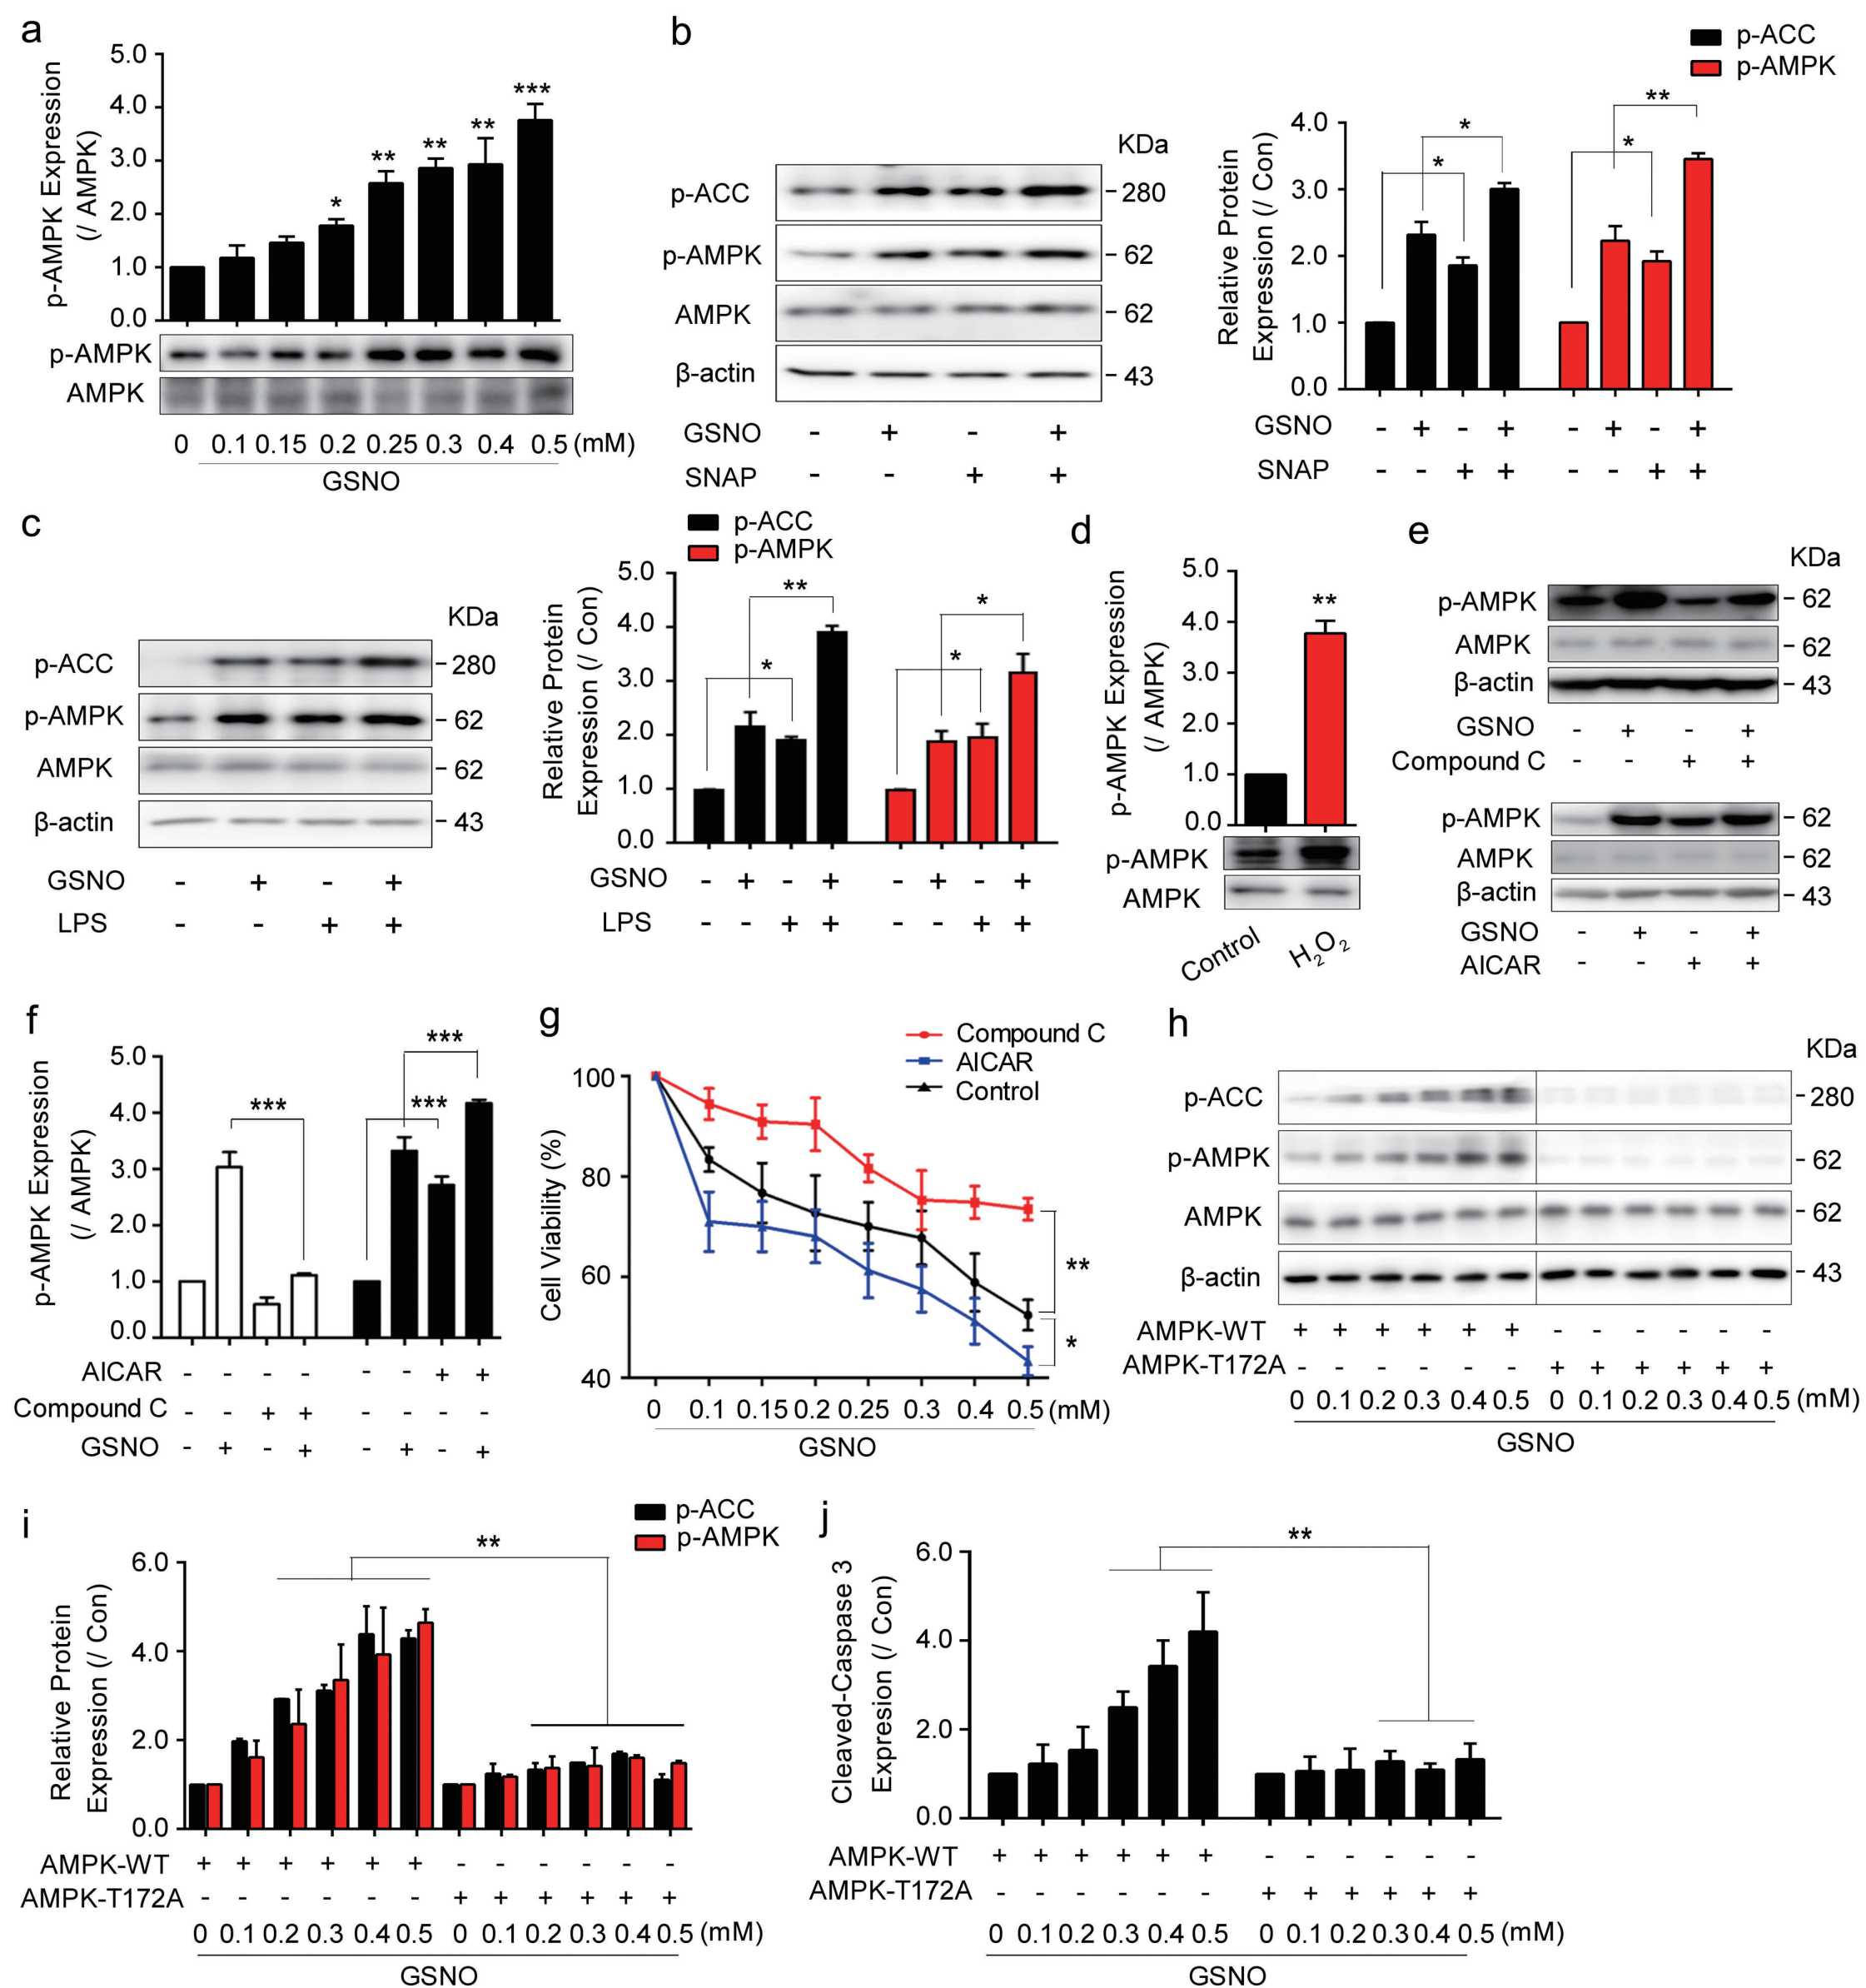

Supplementary Figure 5



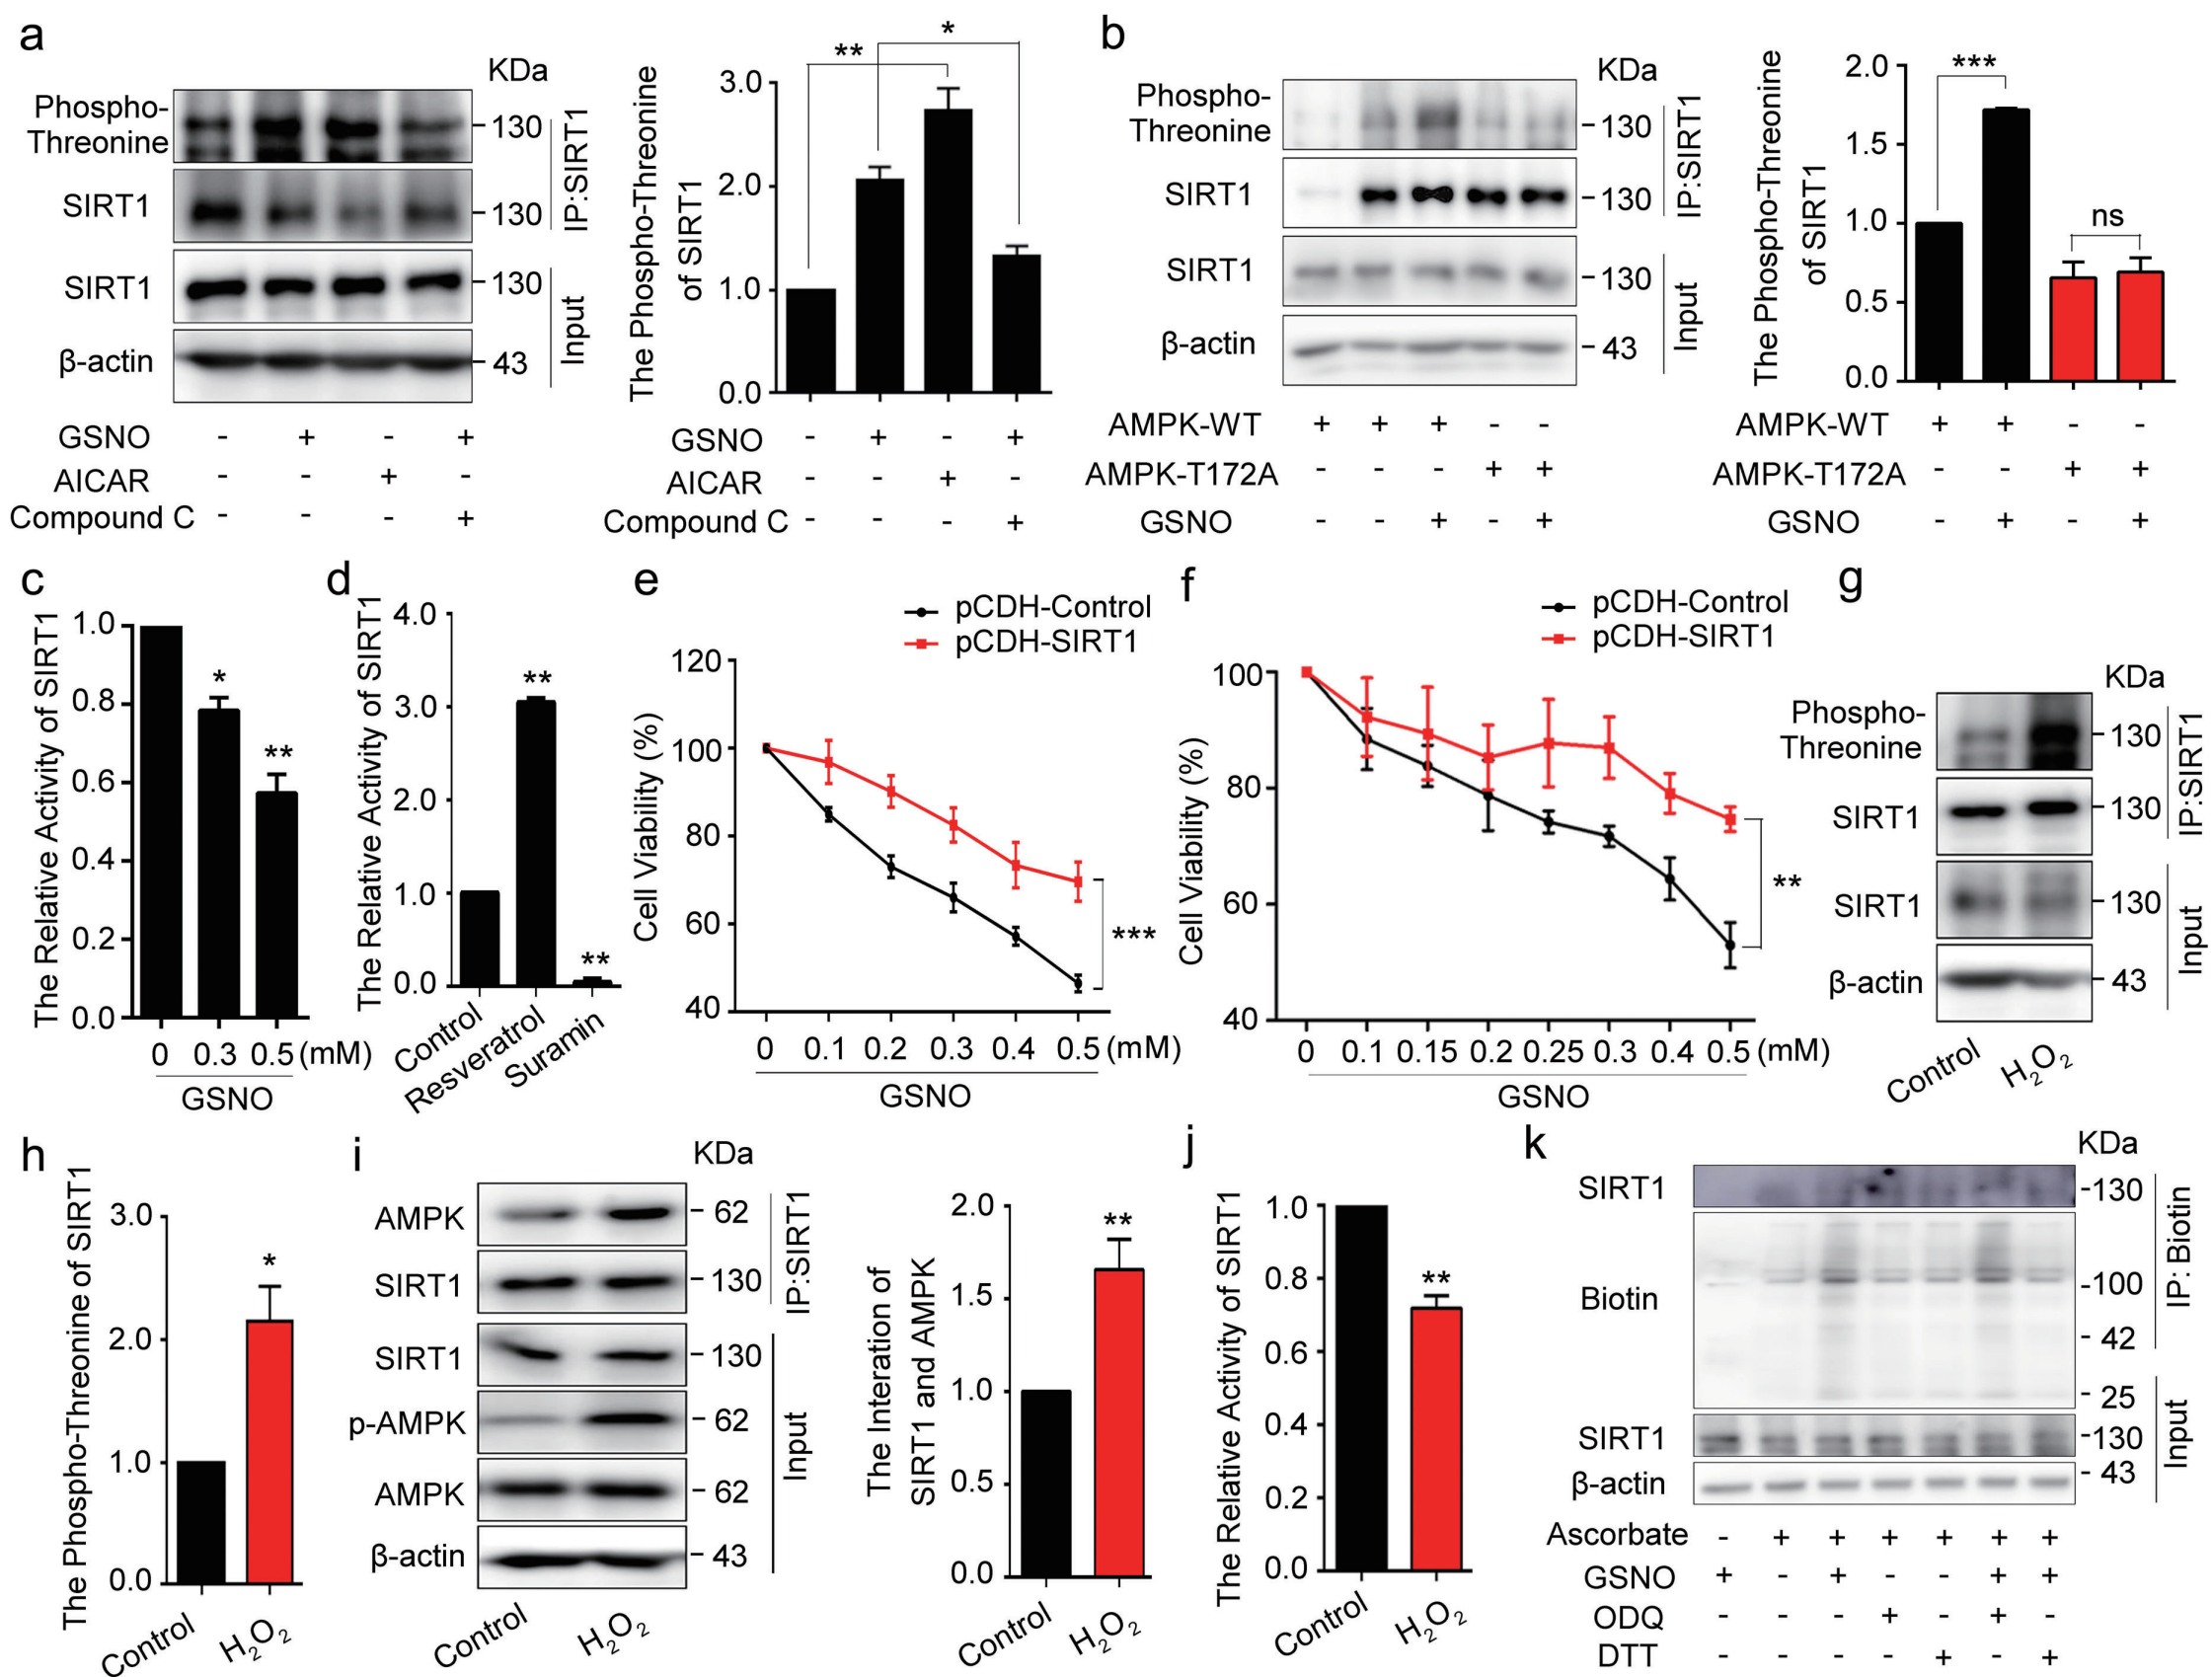

Supplementary Figure 6

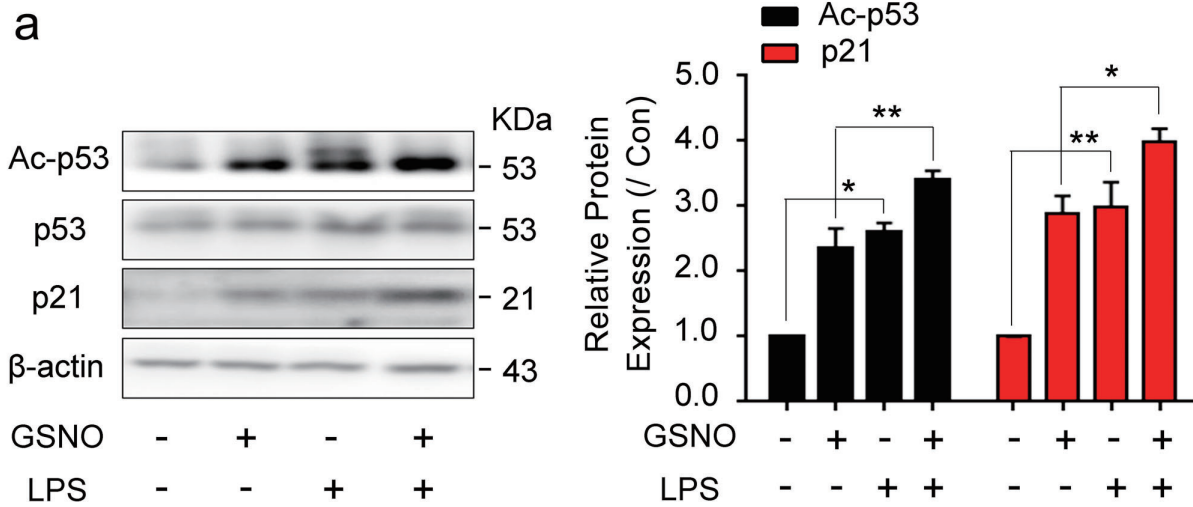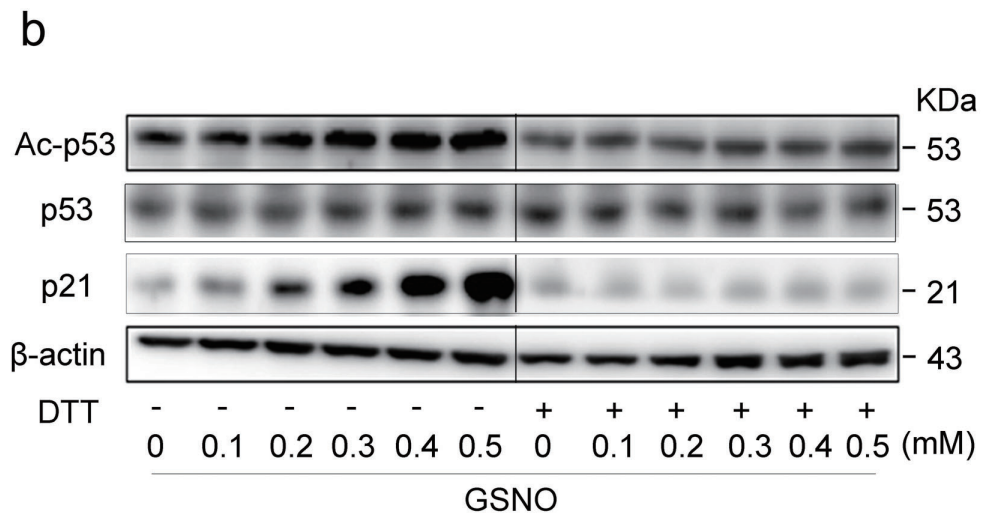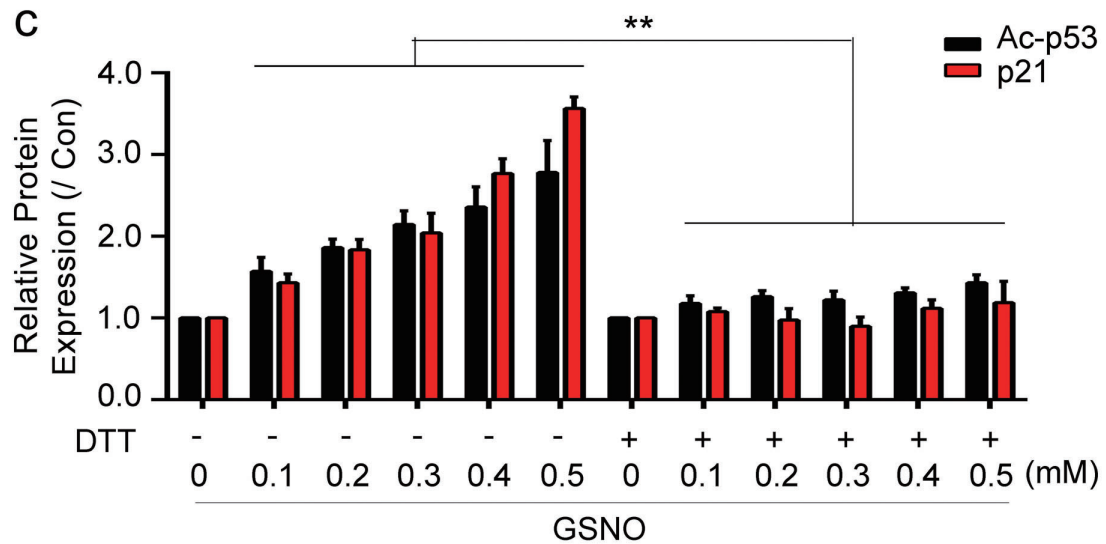

Supplementary Figure 7

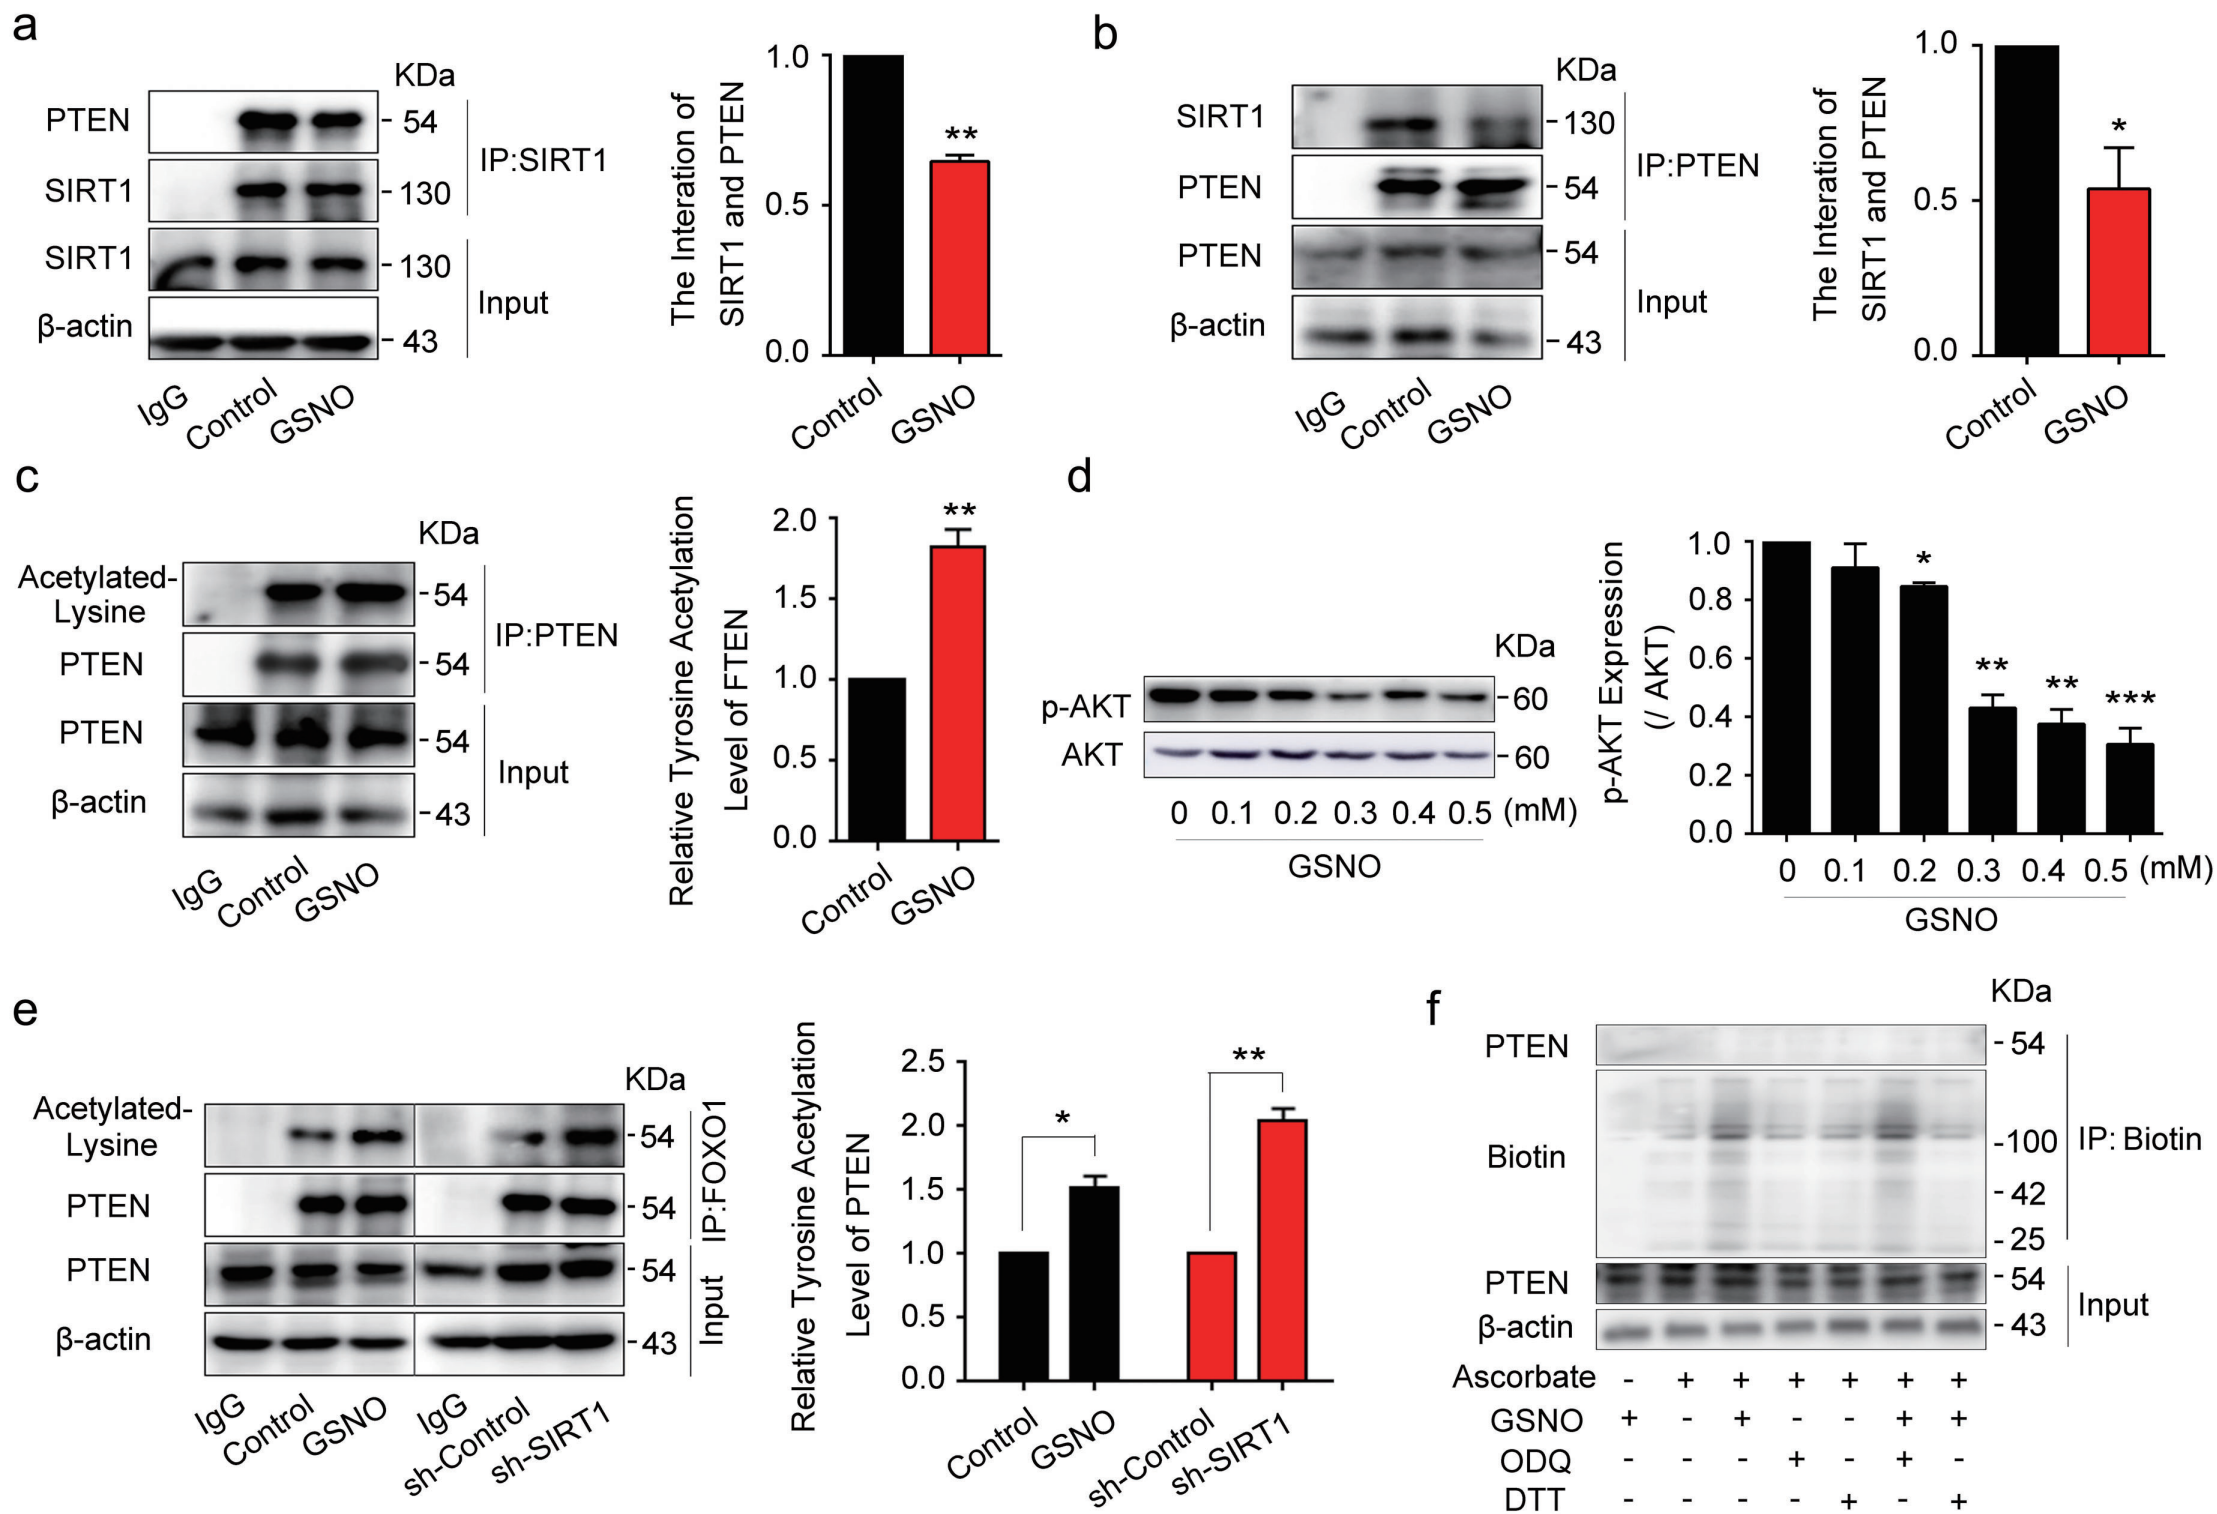

Supplementary Figure 8



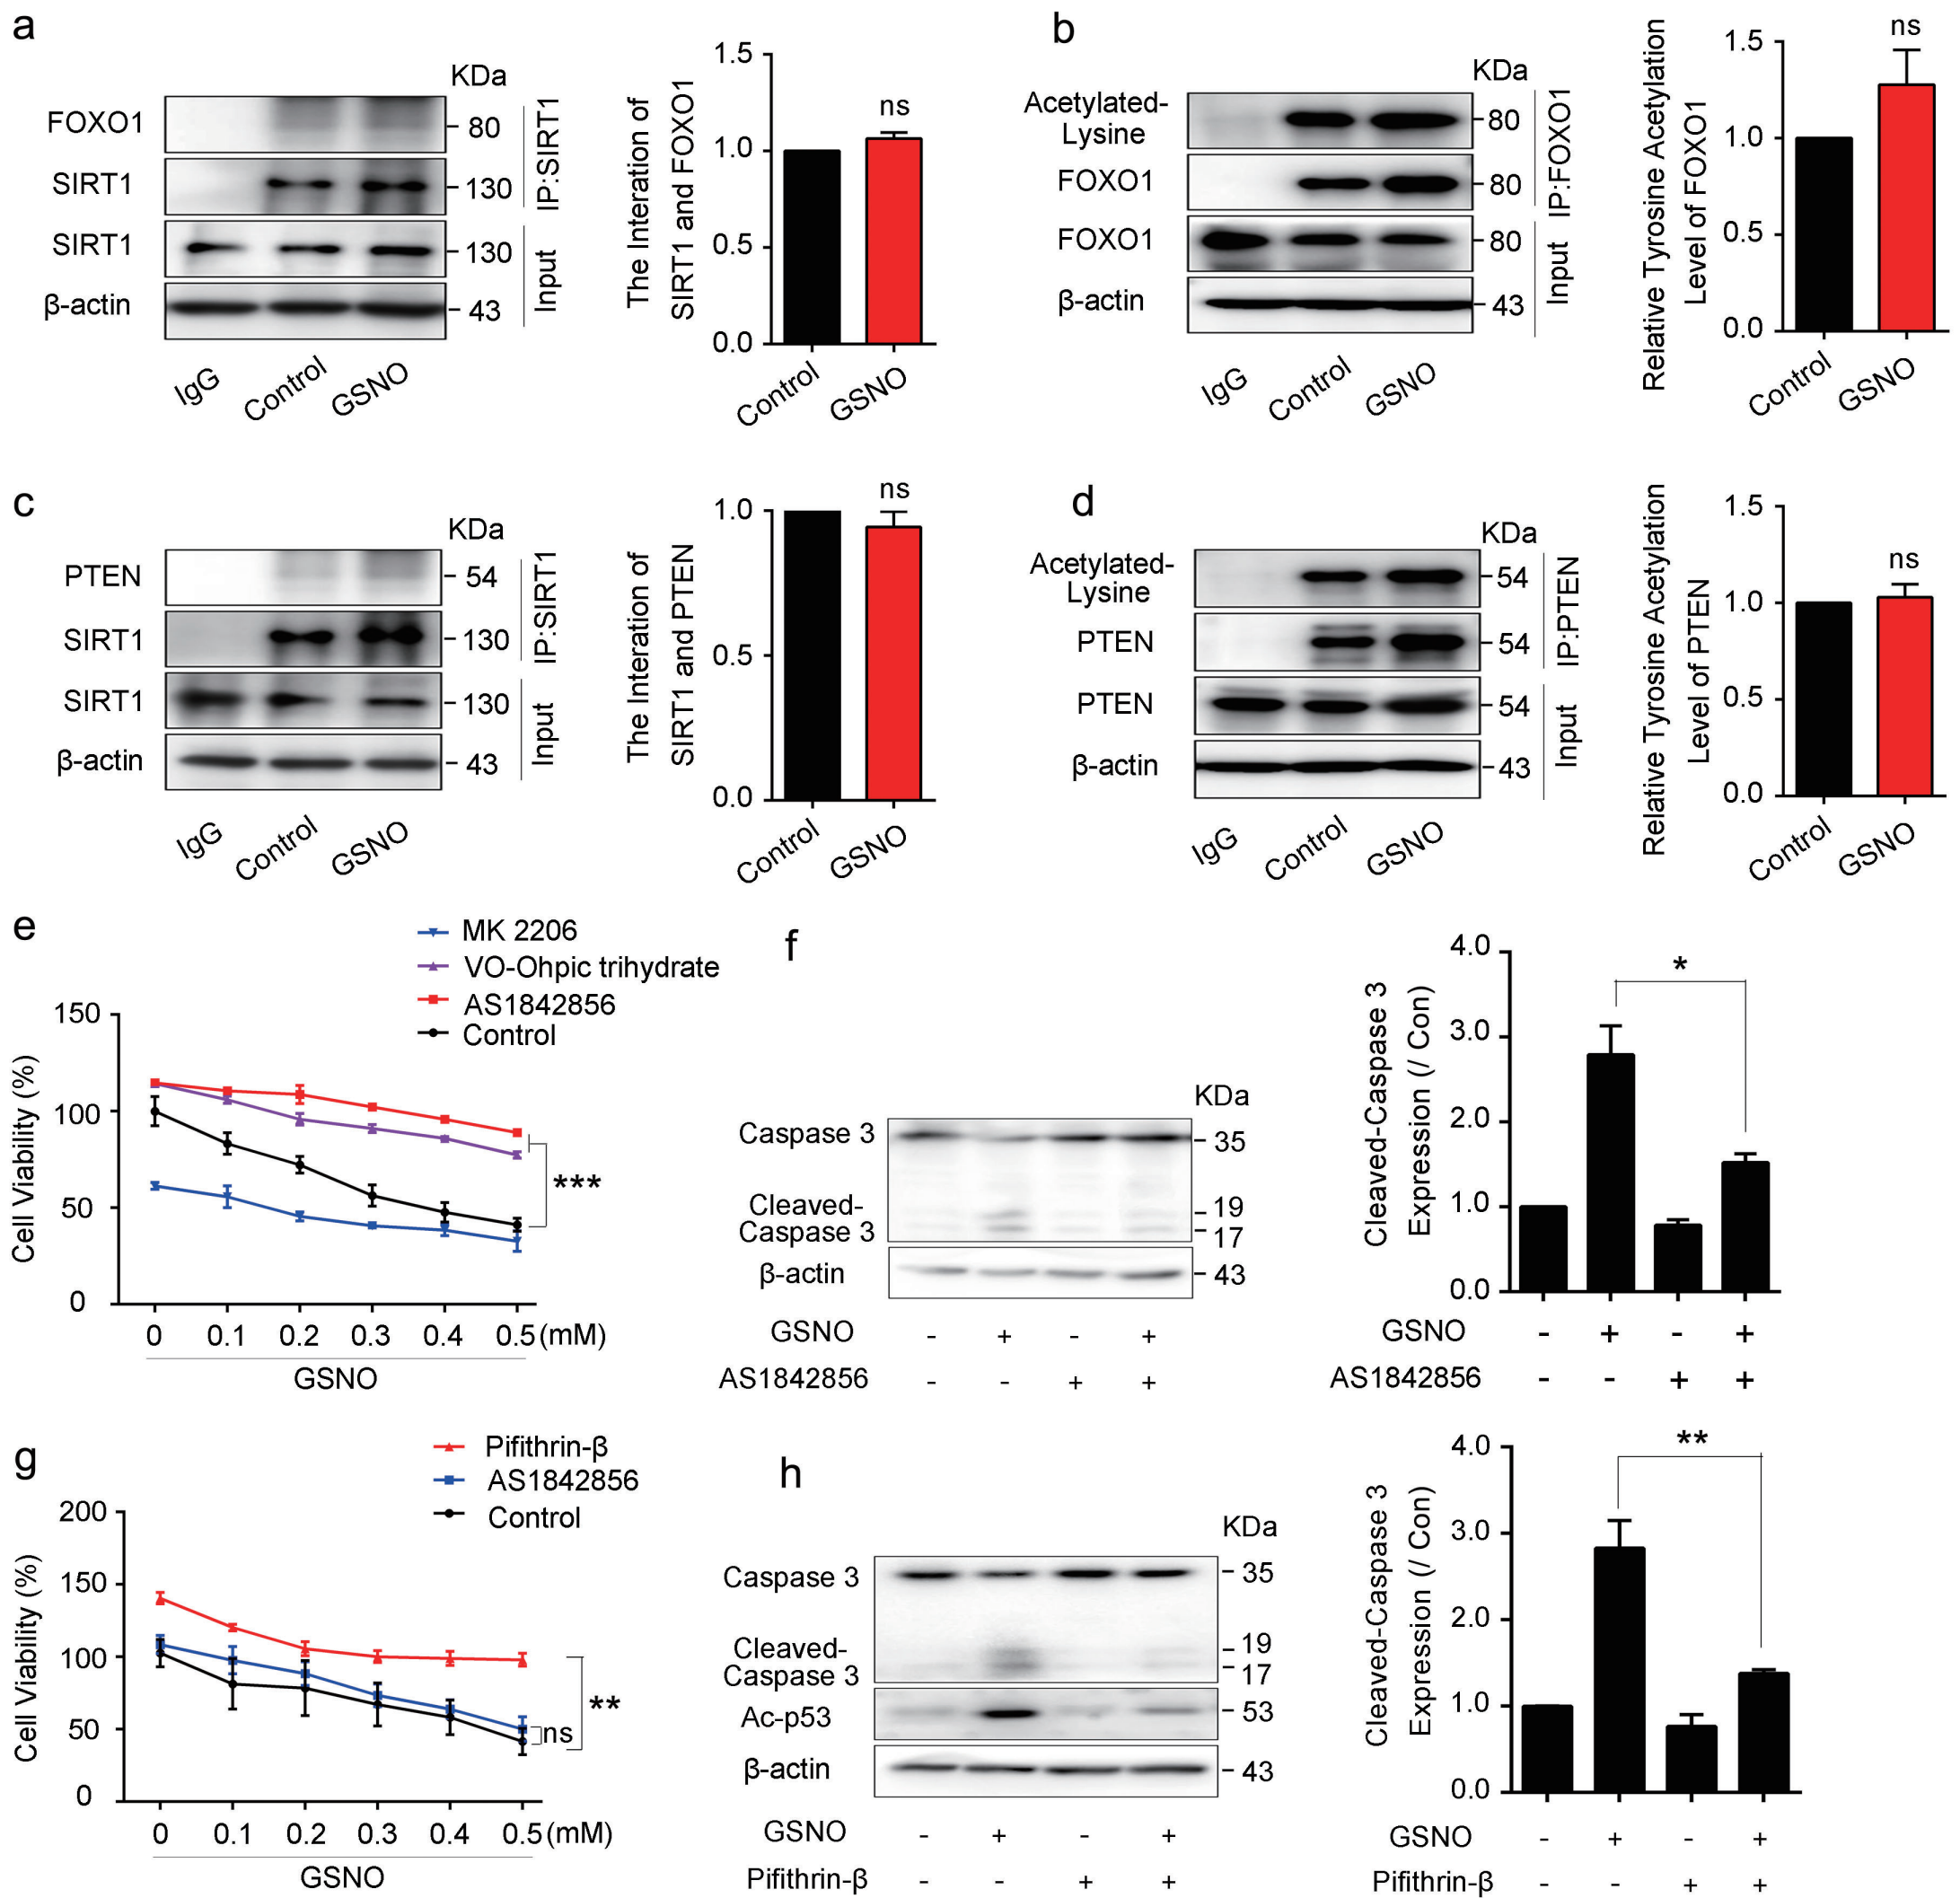

Supplementary Figure 9

**a**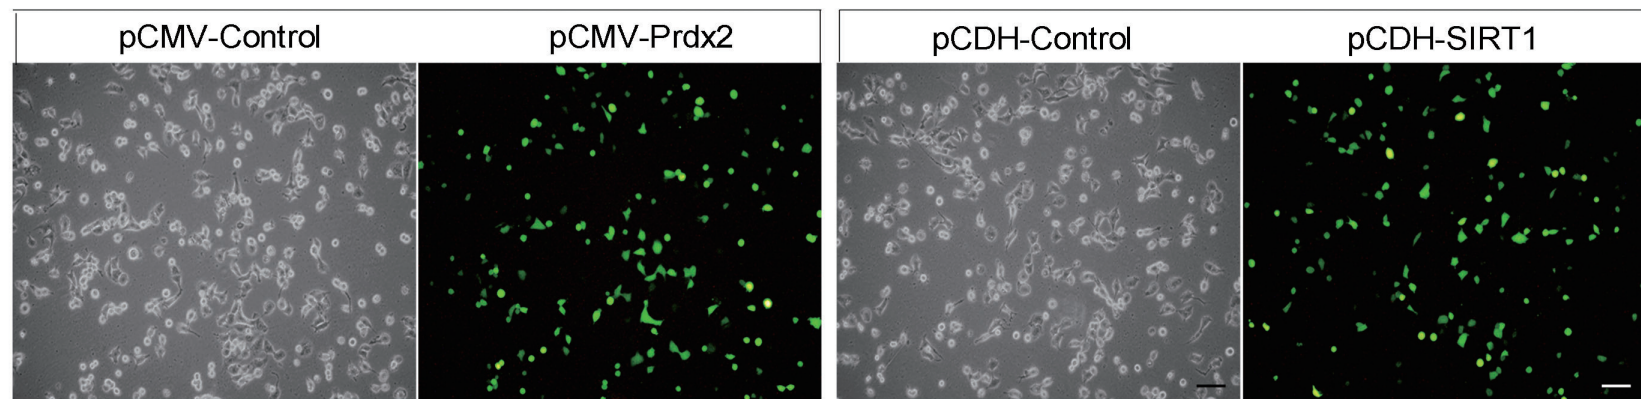**b**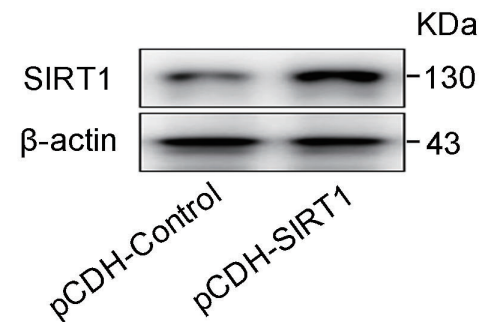**c**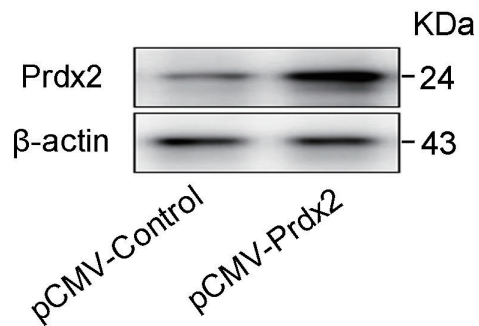**d**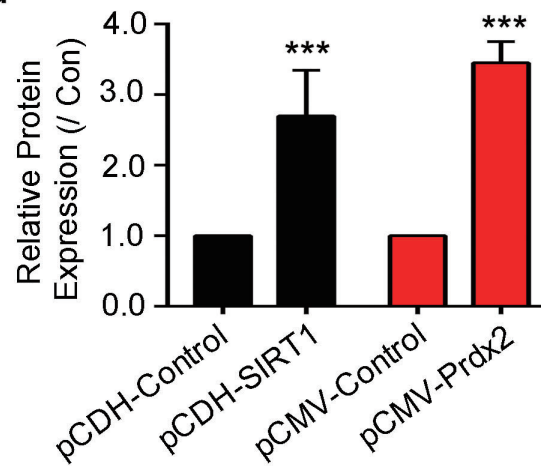**e**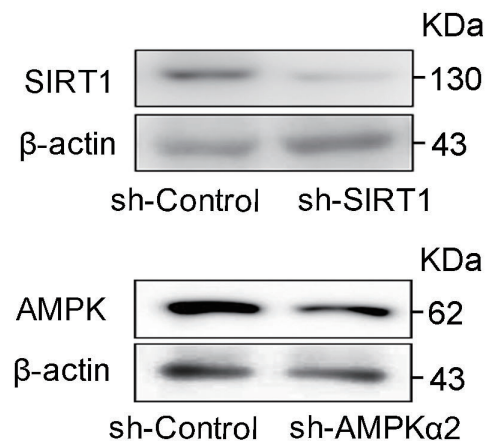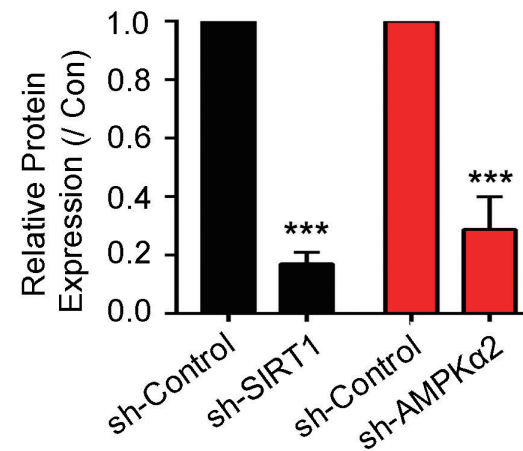

Supplement: 41419_2019_1561_MOESM1_ESM.pdf [file 41419_2019_1561_MOESM1_ESM.pdf]
